1 Mad1's ability to interact with Mad2 is essential to regulate and monitor meiotic synapsis  
2 in *C. elegans*

3

4 Alice Devigne and Needhi Bhalla\*

5 Department of Molecular, Cell and Developmental Biology, University of California,

6 Santa Cruz,

7 Santa Cruz, CA 95064

8

9 \*corresponding author: [nbhalla@ucsc.edu](mailto:nbhalla@ucsc.edu)

10 Department of Molecular, Cell and Developmental Biology

11 225 Sinsheimer Labs

12 University of California, Santa Cruz

13 Santa Cruz, CA 95064

14 phone: (831) 459-1319

15 fax: (831) 459-3139

16

17

18 **ABSTRACT**

19 Meiotic homolog synapsis is essential to ensure accurate segregation of chromosomes  
20 during meiosis. In *C. elegans*, synapsis and a checkpoint that monitors synapsis relies on  
21 the spindle checkpoint components, Mad1 and Mad2, and Pairing Centers (PCs), cis-  
22 acting loci that interact with the nuclear envelope to mobilize chromosomes within the  
23 nucleus. Here, we show that mutations in some spindle checkpoint mutants affect PC  
24 movement early in meiotic prophase, consistent with a link between PC mobility and the  
25 regulation of synapsis. Further, we test what specific functions of Mad1 and Mad2 are  
26 required to regulate and monitor synapsis. We find that a mutation that abrogates Mad1's  
27 localization to the nuclear periphery abolishes the synapsis checkpoint but has no effect  
28 on Mad2's localization to the nuclear periphery or synapsis. By contrast, a mutation that  
29 prevents Mad1's interaction with Mad2 abolishes the synapsis checkpoint, delays  
30 synapsis and fails to localize Mad2 to the nuclear periphery. These data indicate that  
31 Mad1's primary role in regulating synapsis is through control of Mad2 and that Mad2 can  
32 bind other factors at the nuclear periphery. We also tested whether Mad2's ability to  
33 adopt a specific conformation associated with its activity during spindle checkpoint  
34 function is required for its role in meiosis. A mutation that prevents Mad2 from adopting  
35 its active conformer fails to localize to the nuclear periphery, abolishes the synapsis  
36 checkpoint and exhibits substantial defects in meiotic synapsis. Thus, Mad2, and its  
37 regulation by Mad1, is a major regulator of meiotic synapsis in *C. elegans*.

38

39

40

41 **AUTHOR SUMMARY**

42 Sexual reproduction relies on production of gametes, such as eggs and sperm, which are  
43 produced during meiosis. During this specialized cell division, chromosomes replicate,  
44 pair with their homologs, undergo synapsis and finally undergo recombination, all of  
45 which are required for correct meiotic chromosome segregation. Chromosomes are  
46 highly mobile during these steps in meiosis but the specific role of this mobility is  
47 unclear. Here, we show that spindle assembly checkpoint proteins, Mad1 and Bub3, that  
48 regulate and monitor meiotic synapsis are implicated in chromosome movement,  
49 solidifying the functional link between chromosome mobility and synapsis. Moreover, we  
50 provide additional data that another spindle checkpoint effector, Mad2, and its regulation  
51 by Mad1, plays an important role in regulating meiotic synapsis.

52

53

## 54 INTRODUCTION

55 Meiosis is a specialized biological process during which cells undergo a single round of  
56 DNA replication followed by two successive rounds of cell division. This process  
57 produces haploid gametes from diploid organisms. Diploidy is restored during sexual  
58 reproduction by the fusion of gametes, such as eggs and sperm, during fertilization,  
59 producing embryos. If chromosomes missegregate during meiosis, gametes and, upon  
60 their fertilization, embryos, will have the wrong number of chromosomes, also called  
61 aneuploidy. Aneuploidy during meiosis is frequently associated with miscarriages,  
62 infertility, and birth defects such as Down syndrome.

63

64 To ensure that chromosome segregation occurs normally during meiosis, critical events in  
65 meiotic prophase are tightly coordinated, monitored and regulated. Briefly, after  
66 replication, chromosomes pair with their homologs. Homologous interactions are  
67 stabilized by the assembly of a proteinaceous structure, the synaptonemal complex (SC)  
68 during a process called synapsis. Synapsis is a prerequisite for crossover recombination  
69 to generate linkages, or chiasmata, between homologs. These events are essential to  
70 direct proper meiotic chromosome segregation in which homologs and sister chromatids  
71 are separated during meiosis I and meiosis II respectively.

72

73 Because of their importance, multiple cell cycle checkpoints ensure the normal  
74 progression of synapsis and recombination, delay the cell cycle to correct errors and  
75 promote the removal of persistent abnormal cells (MacQueen and Hochwagen, 2011).  
76 One such checkpoint response, the synapsis checkpoint, triggers apoptosis to eliminate

77 nuclei with unsynapsed chromosomes in *Caenorhabditis elegans* (Bhalla and Dernburg,  
78 2005). This checkpoint relies on Pairing Centers (PCs), cis acting sites at one end of each  
79 chromosome promote pairing and synapsis (Bhalla and Dernburg, 2005; MacQueen et al.,  
80 2005). PCs play an important role, anchoring chromosome ends at the nuclear envelope  
81 to enable interaction with the SUN-1/ZYG-12 complex that spans the nuclear envelope;  
82 this interaction enables PCs to access the microtubule network in the cytoplasm  
83 (Labrador et al., 2013; Penkner et al., 2007; Sato et al., 2009), allowing chromosomes to  
84 become mobile within the nucleus. This mobilization is a conserved feature of meiotic  
85 prophase and essential for pairing and synapsis (Bhalla and Dernburg, 2008). Whether  
86 this mobilization also contributes to checkpoint function is unknown.

87

88 We recently showed that mitotic spindle assembly checkpoint (SAC) components Mad1,  
89 Mad2 and Bub3 are required to negatively regulate synapsis and promote the synapsis  
90 checkpoint response in *C. elegans* (Bohr et al., 2015). The genes that encode the *C.*  
91 *elegans* orthologs of Mad1 and Mad2 are *mdf-1* and *mdf-2*, respectively. However, for the  
92 sake of clarity, we will refer to these genes as *mad-1* and *mad-2* and their respective  
93 proteins as MAD-1 and MAD-2, consistent with *C. elegans* nomenclature. MAD-1 and  
94 MAD-2 localize to the nuclear envelope and interact with SUN-1, leading us to propose  
95 that these proteins may regulate and monitor synapsis through the ability of PCs to  
96 interact with and move at the nuclear envelope (Bohr et al., 2015). Indeed, PCs exhibit  
97 stereotypical behavior, called processive chromosome motions (PCMs), in which PCs  
98 travel continuously in a single direction for several seconds, often stretching  
99 chromosomes (Wynne et al., 2012). PCMs are dispensable for homolog pairing, reduce in

100 frequency upon homolog synapsis and depend on the microtubule motor, dynein (Wynne  
101 et al., 2012). Since dynein is required for synapsis (Sato et al., 2009), PCMs have been  
102 suggested to trigger synapsis between accurate homolog pairs (Wynne et al., 2012).

103

104 Here we test whether spindle checkpoint components implicated in the synapsis  
105 checkpoint also affect PC movement, providing a potential link between chromosome  
106 mobility and the regulation and monitoring of meiotic synapsis. We find that SAC  
107 checkpoint mutants reduce the frequency of PCMs during meiotic prophase, consistent  
108 with the acceleration of synapsis observed in these mutant backgrounds. Further we  
109 investigate what functional aspects of SAC components are required for an efficient  
110 synapsis checkpoint. We show the N-terminal portion of MAD-1, required for the  
111 localization of the protein to the nuclear periphery, is also required for the synapsis  
112 checkpoint. However, unlike other mutant alleles of MAD-1, this inability to localize to  
113 the nuclear envelope does not affect MAD-2 localization or synapsis. In contrast, a  
114 mutation that affects MAD-1's interaction with MAD-2 is crucial for MAD-2's  
115 localization at the nuclear envelope, timely synapsis and a functional checkpoint. Finally,  
116 we demonstrate that the closed conformation of MAD-2 is required to regulate and  
117 monitor synapsis. Thus, MAD-2, and its regulation by MAD-1, seems to be a major  
118 regulator of meiotic synapsis in *C. elegans*.

119

## 120 **RESULTS**

121

### 122 **PC movements are affected in SAC mutants**

123 At the onset of meiosis, chromosomes are anchored to the nuclear envelope through their  
124 PCs. Prior to the entry to meiosis, the trans-membrane protein complex SUN-1/ZYG-12  
125 is evenly distributed all around the nuclear envelope: SUN-1 faces the nucleus and  
126 mediates interaction with PCs and ZYG-12 faces the cytoplasm to mediate interactions  
127 with microtubules (Labrador et al., 2013; Penkner et al., 2007; Sato et al., 2009). The  
128 attachment of PCs to the SUN-1/ZYG-12 trans-membrane protein complex at the nuclear  
129 envelope leads to aggregation of the complex, which can be visualized cytologically as  
130 the formation of patches at the nuclear periphery (Baudrimont et al., 2010; Harper et al.,  
131 2011; Penkner et al., 2007; Sato et al., 2009). These patches are highly mobile, depend on  
132 microtubules for their mobility (Sato et al., 2009) and adopt two distinct modes of  
133 displacement: 1) periods when these patches are moving in different directions, while  
134 remaining close to their point of origin; and 2) processive chromosome motions (PCMs),  
135 where patches are continuously moving in the same direction for up to several seconds  
136 (Wynne et al., 2012). PCMs are not required for homolog pairing and reduce in  
137 frequency with synapsis, consistent with a role in regulating synapsis (Wynne et al.,  
138 2012). PCMs have been shown to occur approximately 15% of the time that SUN-  
139 1/ZYG-12 patches are visible (Wynne et al., 2012). These patches of SUN-1/ZYG-12  
140 persist until synapsis is complete. After synapsis, the SUN-1/ZYG-12 complex is  
141 redistributed throughout nuclear envelope (Baudrimont et al., 2010).

142

143 In a previous work, we showed that MAD-1 and BUB-3 negatively regulate synapsis in a  
144 PC-dependent manner (Bohr et al., 2015). Given that PCMs correlate with the onset of  
145 synapsis and that chromosome mobility ceases when SC components are loaded

146 prematurely on chromosomes (Zhang et al., 2012), we reasoned that MAD-1 and BUB-  
147 3's inhibition of synapsis may be through regulation of PCMs. Therefore, we monitored  
148 PC movement in *mad-1* and *bub-3* mutants. We introduced the SUN-1-mRuby fusion  
149 protein (Rog and Dernburg, 2015) into *mad-1* and *bub-3* mutants and visualized PC  
150 movement using the two-dimensional assay previously developed (Wynne et al., 2012).

151

152 For all genotypes, we analyzed 3 to 5 nuclei from 2 to 3 wildtype germlines. In control  
153 animals, we detected 4-6 SUN-1-mRuby patches per nucleus with an average size of  
154  $0.65\mu\text{m}$  (Figure 1A), consistent with what has been previously reported (Wynne et al.,  
155 2012). When we analyzed SUN-1-mRuby patches in both *mad-1* and *bub-3* mutants, the  
156 number and size of patches were not different than that observed in control animals  
157 (Figure 1A), indicating that chromosome attachment did not appear perturbed.

158

159 We then wanted to analyze the mobility of SUN-1-mRuby patches, specifically PCMs.  
160 To analyze PCMs, we used criteria as defined in Wynne et al., 2012, in which SUN-1-  
161 mRuby patches are undergoing PCMs when they reach the minimum speed of  $0.4\mu\text{m/s}$   
162 for at least 1.2 sec. We found that that SUN-1-mRuby patches participated in PCMs  
163 (Video 1) for 13.6% of the time that they were mobile as patches in control worms,  
164 similar to the 15% observed (Wynne et al., 2012). The remaining time, patches exhibit  
165 short-range motions that are restricted to a small area. However, in contrast to control  
166 animals, we found that PCMs occur in *mad-1* (Video 2) and *bub-3* (Video 3) mutants but  
167 are only 4.44% and 3.88% of the observed PC movements respectively (Figure 1A).  
168 Despite being reduced in frequency, SUN-1-mRuby patches in *mad-1* and *bub-3* mutants



169 traveled the same average distance when undergoing rapid chromosome movements as  
170 control animals (Figure 1A and B). Therefore, in these mutants, PCs still undergo  
171 stereotypical PCMs but at a reduced frequency, consistent with the accelerated synapsis  
172 we observe in *mad-1* and *bub-3* mutants.

173

174 **MAD-1's localization to nuclear envelope is required for the synapsis checkpoint**  
175 **but not to regulate synapsis**

176

177 Having established that PC movements are affected when some SAC components are  
178 mutated or deleted (Figure 1), we investigated which specific functions of some SAC  
179 components are necessary for the synapsis checkpoint and regulating synapsis. We  
180 previously showed that MAD-1 localizes to the nuclear periphery during meiotic  
181 prophase (Bohr et al., 2015). Therefore, we tested whether this localization was required  
182 for monitoring and regulating synapsis ( $\Delta$ N-MAD-1 in Figure S1). Amino acids 151 to  
183 320 are required for MAD-1's interaction with the nuclear pore component Tpr (NPP-21  
184 in *C. elegans*) and its localization to the nuclear periphery in mitotic germline cells (Lara-  
185 Gonzalez et al., 2019). Deletion of this region also abrogated localization of MAD-1 at  
186 the nuclear periphery of meiotic germline nuclei (Figure 2A). In contrast to control  
187 animals with wildtype MAD-1,  $\Delta$ N-MAD-1 adopted a diffuse localization inside nuclei  
188 and occupied area devoid of DNA (Figure 2A).

189

190 Next, we tested what effect this deletion had on the synapsis checkpoint (Bohr et al.,  
191 2015). Synapsis is characterized by the assembly of a protein structure called

192 synaptonemal complex (SC) between homologous chromosomes (Bhalla and Dernburg,  
193 2008). In *C. elegans*, this protein structure is composed of a family of proteins, one of  
194 which is SYP-1. *syp-1* mutants do not load SC between homologues, producing  
195 unsynapsed chromosomes (MacQueen et al., 2002). In response to this abnormality, both  
196 the synapsis and DNA damage checkpoints are activated, resulting in very high levels of  
197 germline apoptosis (Figure 2B and C) (Bhalla and Dernburg, 2005). When we introduced  
198 the  $\Delta N$ -*mad-1* deletion into the *syp-1* mutant background, the double mutant exhibited an  
199 intermediate level of germline apoptosis, indicating that the ability of MAD-1 to interact  
200 with Tpr and localize to the nuclear periphery is required for either synapsis or DNA  
201 damage checkpoint (Figure 2C). To determine which checkpoint is affected by the loss of  
202 the N terminus of MAD-1, we abolished the DNA damage checkpoint by using the *spo-*  
203 *11;syp-1* mutant background. SPO-11 generates double-strand breaks to initiate meiotic  
204 recombination (Dernburg et al., 1998); therefore, in this background only the synapsis  
205 checkpoint is activated (Figure 2B) (Bhalla and Dernburg, 2005). When we generate the  
206  $\Delta N$ -*mad-1;spo-11;syp-1* triple mutants, we observe wild-type levels of apoptosis,  
207 indicating the N terminus of MAD-1 is required for the synapsis checkpoint (Figure 2C).  
208  
209 We previously showed that in some spindle checkpoint mutants, a role in the synapsis  
210 checkpoint is coupled to a role in regulating synapsis. To determine whether this is also  
211 true for  $\Delta N$ -*mad-1* deletion mutants, we assessed synapsis progression by staining for two  
212 SC proteins. We stained for HTP-3, an axial element that is loaded between sister  
213 chromatids before synapsis (MacQueen et al., 2005) and for SYP-1 (MacQueen et al.,  
214 2002). When we overlay HTP-3 and SYP-1 staining signals, stretches of HTP-3 without

215 SYP-1 indicates the presence of unsynapsed chromosomes (arrows in Figure 2E) while  
216 colocalization of HTP-3 and SYP-1 indicates complete synapsis (Figure 2E). In *C.*  
217 *elegans*, meiotic nuclei in the germline are organized in a spatiotemporal gradient.  
218 Therefore, we divided germlines into six equivalent zones and calculated the percentage  
219 per zone of nuclei exhibiting complete synapsis to assay the progression of synapsis  
220 (Figure 2D). When we performed this analysis,  $\Delta N$ -*mad-1* deletion mutants resembled  
221 wildtype germlines (Figure 2D), demonstrating that while the localization of MAD-1 to  
222 the nuclear envelope is required to monitor synapsis (Figure 2C), it is not required to  
223 regulate synapsis (Figure 2D). This is in contrast to other mutations in *mad-1* that both  
224 regulate and monitor synapsis (Bohr et al., 2015).

225

226 **MAD-1 is not required for MAD-2's localization to the nuclear envelope in meiotic**  
227 **germline nuclei**

228

229 Since  $\Delta N$ -*mad-1* mutants did not affect synapsis (Figure 2D), unlike other *mad-1* mutants  
230 we had characterized (Bohr et al., 2015), we tested whether  $\Delta N$ -*mad-1* deletion mutants  
231 affect the localization of another protein required for the synapsis checkpoint, MAD-2.  
232 MAD-2 adopts the same localization as MAD-1 in meiotic germline nuclei: the protein is  
233 targeted to the nuclear periphery in a punctate pattern (Bohr et al., 2015). We performed  
234 immunostaining using antibodies against nuclear pore complexes (NPCs) and MAD-2  
235 and observed that, in contrast to a mutation that abolishes MAD-1's checkpoint function  
236 (*mad-1[av19]*) and a null mutation in MAD-1 (*mad-1[gk2]*), MAD-2 localization to the  
237 nuclear periphery was unaffected by MAD-1's absence from the nuclear periphery in  $\Delta N$ -

238 *mad-1* deletion mutants (Figure 3). As a control, we performed immunofluorescence  
239 against MAD-2 in *mad-2* null mutants (Figure 3). We also verified that MAD-2  
240 localization was unaffected in *bub-3* mutants (Figure 3), having established a role for this  
241 gene in regulating and monitoring synapsis (Bohr et al., 2015) and affecting PCMs  
242 (Figure 1).

243

#### 244 **MAD-1's interaction with BUB-1 is not required to monitor or regulate synapsis**

245

246 We had previously hypothesized that MAD-1's localization to the nuclear periphery in  
247 meiotic germline nuclei suggested an interaction with PCs, cis-acting chromosomal  
248 regions essential for pairing, synapsis and synapsis checkpoint function (Bohr et al.,  
249 2015). In this way, we compared unsynapsed PCs to unattached kinetochores, which  
250 recruit Mad1 and Mad2 to initiate spindle assemble checkpoint signaling (Lara-Gonzalez  
251 et al., 2012). To further explore this connection, we took advantage of a mutation in  
252 Mad1 that prevents its localization to unattached kinetochores.

253

254 MAD-1 is recruited to unattached kinetochores through its interaction with BUB-1, a  
255 conserved kinase that is essential for chromosome segregation and spindle checkpoint  
256 function. We used a mutant version of MAD-1, *mad-1(E419A, R420A, D423A)* (Figure  
257 S1) that abolishes its binding to BUB-1, its localization to unattached kinetochores and its  
258 function in the spindle checkpoint (Moyle et al., 2014). We will refer to this allele as  
259 *mad-1(AAA)*. We tested if MAD-1's ability to bind BUB-1 is also required for MAD-1  
260 localization, checkpoint function and regulation of synapsis in meiosis. We stained fixed

261 germlines with NPCs and MAD-1 antibodies and observed a localization comparable to  
262 wild type MAD-1 (Figure 4A). In this mutant, MAD-2 localization is also unaffected  
263 (Figure 4B). Therefore, the region of MAD-1 that is required to bind BUB-1 and localize  
264 to unattached kinetochores is not required for its localization to the nuclear periphery.  
265  
266 Next, we tested whether this motif was required to regulate and monitors synapsis. We  
267 generated the double and triple mutants *syp-1;mad-1(AAA)* and *spo-11;syp-1;mad-*  
268 *1(AAA)*. When we assayed apoptosis, *syp-1 mad-1(AAA)* mutants were indistinguishable  
269 from *syp-1* single mutants. Similarly, *spo-11;syp-1;mad-1(AAA)* mutants were  
270 indistinguishable from *spo-11;syp-1* mutants (Figure 4C). This result indicates that  
271 neither the synapsis or DNA damage checkpoint are affected in the *mad-1(AAA)* mutants.  
272 When we assayed the progression of synapsis, synapsis in *mad-1(AAA)* mutants  
273 resembled synapsis in wildtype animals (Figure 4D). Thus, the motif required for MAD-  
274 1's ability to interact with BUB-1 is not required for the synapsis checkpoint and does not  
275 regulate synapsis (Figure 4C and D).

276

277

278 **MAD-1's ability to interact with MAD-2 is required to regulate and monitor**  
279 **synapsis**

280

281 The correct localization of MAD-2 in  $\Delta N$ -*mad-1* deletion mutants led us to consider the  
282 effects on regulating and monitoring synapsis if MAD-1 cannot bind MAD-2. We used a  
283 point mutation in *mad-1*, *mad-1(P504A)*, which abolishes its ability to bind MAD-2

284 (Figure S1) (Moyle et al., 2014). We will refer to this allele as *mad-1(A)* in this paper.  
285 First, we verified MAD-1's localization in meiotic germline nuclei in this background.  
286 After staining for MAD-1 and NPCs, we were able to see that this point mutation does  
287 not affect the protein's targeting to the nuclear periphery, similar to wildtype (Figure 5A)  
288 (Bohr et al., 2015; Stein et al., 2007; Yamamoto et al., 2008). Next, we looked at MAD-2  
289 localization in this mutant background and were not able to detect the protein at the  
290 nuclear periphery (Figure 5B), similar to *mad-1(av19)* mutants and *mad-1(gk2)* null  
291 mutants (Figure 3). Thus, MAD-1's ability to bind MAD-2 does not prevent MAD-1's  
292 localization to the nuclear periphery in meiotic germline nuclei but does affect MAD-2's.  
293  
294 We then investigated the implication of MAD-1's ability to bind MAD-2 for the synapsis  
295 checkpoint (Figure 5C). We combined *mad-1(A)* mutation in the *syp-1* background. We  
296 were able to observe an intermediate reduction in the number of apoptotic nuclei,  
297 indicating that one of the two checkpoints is affected by *mad-1(A)* mutation (Figure 5C).  
298 To determine which checkpoint is affected, we generated the triple mutant *mad-1(A);*  
299 *spo-11;syp-1*, which cannot activate the DNA damage checkpoint and only activates the  
300 synapsis checkpoint. Apoptosis was similar to wildtype in these triple mutants, indicating  
301 that MAD-1's ability to bind MAD-2 is required for the synapsis checkpoint (Figure 5C).  
302  
303 Next, we investigated what effect this mutation had on synapsis. We observed that *mad-*  
304 *1(A)* mutants exhibit a dramatic delay of synapsis (Figure 5D, zones 2 and 3) and a  
305 reduction in the percentage of nuclei that complete synapsis (Figure 5D, zones 4 and 5,

306 arrows in Figure 5E). Thus, MAD-1's ability to bind MAD-2 is required to promote  
307 synapsis.

308

309 Since this role in promoting synapsis was unexpected, we were concerned that the  
310 synapsis defects we observed might be the indirect consequence of aneuploidy from  
311 defects in mitosis earlier in the germline. To test this, we attempted to detect aneuploidy  
312 in *mad-1(A)* mutant. We performed immunofluorescence with antibodies against HIM-8  
313 to identify aneuploid nuclei that either had no HIM-8 staining or more than two HIM-8  
314 foci (Figure S2). We did not observe any nuclei with no HIM-8 or more than two HIM-8  
315 signals in this mutant background, arguing against defects in ploidy and supporting a role  
316 for MAD-1's ability to bind MAD-2 in regulating timely synapsis.

317

318 To further address this possibility, we scored apoptosis in *mad-1(A)* single mutants.  
319 Defects in mitotic checkpoint function in mitotic germline nuclei can produce aneuploidy  
320 in meiotic nuclei that activate the DNA damage checkpoint and elevate apoptosis  
321 (Stevens et al., 2013). However, the level of apoptosis in *mad-1(A)* single mutants was  
322 comparable to wildtype animals (Figure 5C), supporting our hypothesis that the synapsis  
323 defects we observe in *mad-1(A)* mutant are not a consequence of defects in the mitotic  
324 region of the germline and are likely not severe enough to activate the DNA damage  
325 checkpoint, similar to other mutant backgrounds that exhibit asynapsis in a subset of  
326 meiotic nuclei (Bhalla and Dernburg, 2005; MacQueen et al., 2005). All together, these  
327 data indicate that MAD-1's ability to interact with MAD-2 is important for MAD-2  
328 localization to the nuclear periphery but not for MAD-1 targeting to the nuclear

329 periphery. Further, this interaction is required to promote the synapsis checkpoint and  
330 synapsis. This is in contrast to *mad1* null and *mad-1(av19)* mutants, which promote the  
331 synapsis checkpoint but inhibit synapsis (Bohr et al., 2015).

332

333

334 **MAD-2's ability to adopt the closed conformation is required to regulate and**  
335 **monitor synapsis**

336

337 MAD-2 is essential for the spindle checkpoint and the synapsis checkpoint. Its role in the  
338 spindle checkpoint has been extensively characterized (Lara-Gonzalez et al., 2012).

339 MAD-2 adopts two conformations, an open and a closed conformation, depending on  
340 whether it is binding other protein partners (Rosenberg and Corbett, 2015). The open  
341 version is unbound and inactive in the spindle checkpoint. MAD-2 adopts the closed  
342 version upon binding MAD-1 (Luo et al., 2004; Sironi et al., 2002) either at the nuclear  
343 envelope (Rodriguez-Bravo et al., 2014) or at unattached kinetochores (Chen et al., 1996,  
344 1998; Li and Benezra, 1996; Sironi et al., 2001). It also adopts the closed conformation  
345 when bound to Cdc20 (De Antoni et al., 2005; DeAntoni et al., 2005; Luo et al., 2002),  
346 during formation of the mitotic checkpoint complex. Thus, the closed version of MAD-2  
347 is the active conformer during spindle checkpoint function. Recent work has shown that  
348 when MAD-2 is mutated so that it cannot convert to the closed conformation and remains  
349 locked in its open conformation, this mutant version of the protein cannot support the  
350 spindle checkpoint and is no longer detected at unattached kinetochores (De Antoni et al.,  
351 2005; DeAntoni et al., 2005; Lara-Gonzalez et al., 2021; Nezi et al., 2006). To evaluate



352 the importance of this conversion for its meiotic role, we used a *mad-2* mutant that is  
353 locked in the open conformation (*mad-2[V193N]*); we will refer to this allele as *mad-2-*  
354 *open*.

355

356 First, we determined how this mutation affected the protein's localization. When we  
357 stained germlines with NPCs and MAD-2 antibodies in *mad-2-open* mutants, we could  
358 not detect the protein in meiotic nuclei (Figure 6A), indicating that MAD-2's ability to  
359 adopt the closed conformer is required for its localization to the nuclear periphery.

360

361 Next, we evaluated its role in the synapsis checkpoint. We introduced this mutation into  
362 *syp-1* mutants and assayed apoptosis. When compared to the *syp-1* single mutant  
363 background, the *syp-1;mad-2-open* double mutants exhibit an intermediate level of  
364 apoptosis (Figure 6B), indicating that either the synapsis checkpoint or the DNA damage  
365 checkpoint is affected. Because the *mad-2* gene is closely linked to *spo-11*, we used *cep-1*  
366 to prevent DNA damage checkpoint-induced apoptosis in *mad-2-open* mutants. *cep-1* is  
367 the *C. elegans* ortholog of p53 and is required for the DNA damage response (Derry et  
368 al., 2001; Schumacher et al., 2001). We generated the *mad-2-open;cep-1;syp-1* triple  
369 mutant to clarify which checkpoint is affected. We observed a wild type level of  
370 apoptosis in *mad-2-open;cep-1;syp-1* triple mutants, indicating the ability to adopt the  
371 closed conformation is required for the synapsis checkpoint (Figure 6B).

372

373 Having established that this mutant disrupted the synapsis checkpoint, we assessed its  
374 effect on synapsis (Figure 6C and D). We observed a dramatic delay and reduction in the

375 percentage of nuclei that completed synapsis in *mad-2 open* mutants. This phenotype is  
376 more severe than the one observed for *mad-1(A)* mutant (Figure 5D). In *mad-1(A)*  
377 mutants, 70% of meiotic nuclei complete synapsis in zone 4, while in *mad-2-open*  
378 mutants, only 40% do (Figure 5D and Figure 6C and D). Since complete synapsis is  
379 required for the proper progression of DNA repair and meiotic recombination, this severe  
380 defect in synapsis likely explains the elevated apoptosis we observe in *mad-2-open* single  
381 mutants (Figure 6B). Indeed, when *mad-2-open;cep-1* double mutants are generated and  
382 apoptosis assayed, the level of apoptosis is similar to *cep-1* single mutants and  
383 significantly lower than *mad-2-open* single mutants, indicating that *mad-2-open* mutants  
384 activate the DNA damage checkpoint (Figure S3).

385

386 Similar to our analysis of *mad-1(A)* mutants, we wondered if some of this asynapsis in  
387 *mad-2-open* mutants was the consequence of aneuploidy in meiotic nuclei. To assess this,  
388 we stained *mad-2-open* meiotic nuclei with antibodies against the X chromosome PC  
389 protein, HIM-8. We could detect nuclei that either contained no HIM-8 foci or more than  
390 two, indicating aneuploidy of the X chromosome (Figure S2). When we quantified this  
391 defect, we observed it in 3% of meiotic nuclei. Therefore, some small proportion of  
392 unsynapsed chromosomes in meiotic nuclei are likely the product of aneuploidy and not  
393 strictly a defect in synapsis in *mad-2-open* mutants. However, even if we assigned  
394 comparable rates of aneuploidy to the remaining five autosomes, this degree of  
395 aneuploidy is unlikely to explain the dramatic defect in synapsis that we observe *mad-2-*  
396 *open* mutants.

397

398 **DISCUSSION**

399

400 When we first reported that spindle checkpoint proteins played a role in regulating and  
401 monitoring synapsis, we hypothesized that spindle checkpoint proteins might regulate the  
402 dynamics of PCs at the nuclear envelope, given the relationship between synapsis  
403 initiation and chromosome mobility (Bohr et al., 2015). Our analysis of chromosome  
404 movements in *mad-1* and *bub-3* mutants validates this hypothesis, demonstrating that  
405 stereotypical PC behaviors, namely processive chromosome movements (Wynne et al.,  
406 2012), show the same hallmark features in *mad-1* and *bub-3* mutants as wildtype animals  
407 but are reduced in frequency (Figure 1). Whether this reduction in PCM frequency is a  
408 cause or consequence of the accelerated synapsis we observe in these mutant  
409 backgrounds is still an open question.

410

411 The spindle checkpoint, and the functional requirements of its essential factors, has been  
412 studied extensively (Lara-Gonzalez et al., 2012). We took advantage of these studies to  
413 test what aspects of MAD-1 and MAD-2 function are required for the regulation and  
414 monitoring of synapsis. Somewhat surprisingly, we found that a mutation that abolished  
415 MAD-1's association with the nuclear envelope (Lara-Gonzalez et al., 2019) did not  
416 affect MAD-2 localization (Figure 2A and Figure 3), indicating that MAD-2 can bind  
417 additional factors at the nuclear envelope besides MAD-1 during meiosis. MAD-2 has  
418 been shown to bind the insulin receptor and regulate its internalization dynamics in mice  
419 (Choi et al., 2016), raising the possibility that MAD-2 may bind other factors at the  
420 nuclear envelope in other developmental contexts as well. Further, despite the absence of

421 MAD-1, the presence of MAD-2 at the nuclear envelope still promotes the timely  
422 progression of synapsis (Figure 2D), suggesting that MAD-1's primary role in regulating  
423 synapsis is through control of MAD-2.

424

425 This interpretation is borne out by our analysis of a *mad-1* mutant that no longer binds  
426 MAD-2, *mad-1(A)* (Moyle et al., 2014). This mutant protein is localized to the nuclear  
427 envelope (Figure 5A) but MAD-2 is not (Figure 5B), indicating that although MAD-1  
428 may not be required for MAD-2's localization to the nuclear envelope, this interaction is  
429 required for MAD-2's presence inside the nucleus. This suggests a potential regulatory  
430 role for MAD-1 in shuttling MAD-2 into meiotic nuclei to carry out its role in regulating  
431 and monitoring synapsis.

432

433 We were surprised to observe that *mad-1(A)* mutants, unlike *mad-1* null or *mad-1(av19)*  
434 mutants, delay synapsis (Figure 5D). We ruled out the possibility that this was a  
435 consequence of the spindle checkpoint defect resulting in aneuploidy in meiotic cells  
436 (Figure S2). Further, since *mad-1(AAA)* mutants also have a spindle checkpoint defect  
437 (Moyle et al., 2014) and don't affect synapsis (Figure 4D), we are comfortable attributing  
438 these phenotypes to a meiotic defect. These data suggest when MAD-2 cannot bind  
439 MAD-1, MAD-2 acts as a gain of function, disrupting synapsis. We speculate that this  
440 unregulated population of MAD-2 is now competent to bind additional meiotic factors,  
441 such as CMT-1 and/or PCH-2 (Deshong et al., 2014; Giacomazzi et al., 2020) that it is  
442 normally prevented from interacting with during meiosis. Indeed, the amount of non-  
443 homologous synapsis we observe in *mad-1(A)* mutants, ~4%, is similar to what is

444 observed in *cmt-1* null mutants (Giacopazzi et al., 2020), consistent with this possibility.  
445 Given that MAD-2 interacts with these factors during mitotic spindle checkpoint function  
446 (Nelson et al., 2015), MAD-2's sequestration during meiosis may be an important  
447 regulatory event to promote meiotic synapsis.  
448  
449 Finally, we've shown that MAD-2's ability to adopt its closed conformation is important  
450 for its localization to the nuclear envelope (Figure 6A), its role in the synapsis checkpoint  
451 (Figure 6B) and its regulation of synapsis (Figure 6C). One of the proteins it complexes  
452 with to adopt its closed conformation is definitely MAD-1, as demonstrated by MAD-2  
453 absence from the nuclear envelope in *mad-1(A)* mutants (Figure 5B). However, MAD-2's  
454 continued presence at the nuclear envelope in  $\Delta N$ -*mad-1* mutants (Figure 3) illustrates  
455 that MAD-2 complexes with some other factor at the nuclear envelope during meiotic  
456 prophase and this has important implications for the regulation and monitoring of  
457 synapsis in *C. elegans*. Identifying this factor is an important next step in understanding  
458 MAD-2's meiotic function.  
459  
460 Despite the effect of spindle checkpoint mutants on PC movement (Figure 1) and our  
461 previous model that spindle checkpoint mutants regulate and monitors meiotic synapsis  
462 by assessing whether PCs at the nuclear envelope are synapsed (Bohr et al., 2015), it's  
463 unlikely that the role of spindle checkpoint proteins in regulating and monitoring meiotic  
464 synapsis at unsynapsed PCs can be compared with their role at unattached kinetochores.  
465 First, while a mutation that prevents MAD-1's localization to the nuclear envelope,  $\Delta N$ -  
466 *mad-1*, abrogates the synapsis checkpoint (Figure 2C), it does not affect synapsis (Figure

467 2D), indicating that MAD-1's absence from the nuclear envelope does not affect the  
468 progression of synapsis. Further, the uncoupling of the regulation and monitoring of  
469 synapsis in  $\Delta N$ -*mad-1* mutants indicates that its role in the checkpoint does not depend on  
470 its localization to the nuclear envelope, in direct contrast to our model. It is formally  
471 possible that MAD-1's dispensability in regulating synapsis is because of MAD-2's  
472 continued presence at the nuclear envelope in this mutant background (Figure 3).  
473 However, we do not favor this possibility based on MAD-2's absence at the nuclear  
474 envelope and the dramatic defect in synapsis we observe in *mad-2-open* mutants (Figure  
475 6A and C). If our model was correct, we might have predicted that *mad-2-open* mutants  
476 would accelerate synapsis, similar to *mad-1(av19)* and *mad-1* null mutants, which also  
477 fail to localize MAD-2 at the nuclear envelope (Figure 3). Instead, these data suggest a  
478 more complicated role for spindle checkpoint proteins in regulating and monitoring  
479 synapsis than we had previously proposed. Understanding this role may further expand  
480 the repertoire of spindle checkpoint proteins beyond their well-characterized roles in  
481 regulating the cell cycle and monitoring kinetochore attachment.

482

483

## 484 **MATERIALS AND METHODS**

485

### 486 **Genetics and worm strains**

487 The wild type *C. elegans* strain background was Bristol N2 (Brenner, 1974). All  
488 experiments were performed on adult hermaphrodites at 20°C under standard conditions  
489 unless otherwise stated. Mutations and rearrangements used were as follows:

490 LG I: *cep-1(gk138)*  
491 LG II: *bub-3(ok3437)*, *mln1 [mIs14 dpy-10(e128)]*, *ltSi609[pOD1584/pMM9; Pmdf-*  
492 *1::mdf-1(P504A)::mdf-1 3'UTR; cb-unc-119(+)]*, *ltSi620[pOD1595/pMM13; pmdf-*  
493 *1::GFP::mdf1(E419A, R420A, D423A)::mdf1 3'UTR; cb-unc-119(+)]*, *ltSi677*  
494 *[pPLG034; Pmdf-1::GFP::mdf-1(Δ151–320)::mdf-1 3'UTR; cb-unc-119(+)]*,  
495 *ltSi1514[pPLG333; Pmdf-2::mdf-2 delta hairpin intron 4 V193N::mdf-2 3'UTR; cb-unc-*  
496 *119(+)]*  
497 LG III: *unc-119(ed3)*  
498 LG IV: *mdf-2(tm2190)*, *spo-11(ok79)*, *nT1[unc-?(n754let-?(m435)]*  
499 LG V: *mdf-1(av19)*, *mdf-1(gk2)*, *syp-1(me17)*, *bcIs39[Plim-7::ced-1::gfp; lin-15(+)]*,  
500 *ieSi21 [Psun-1::sun-1::mRuby::sun-1 3'UTR + Cbr-unc-119(+)]*, *dpy-11(e224)*,  
501 *nT1[unc-?(n754let-?(m435)]*

502

### 503 **Quantification of germline apoptosis**

504 Scoring of germline apoptosis was performed as previously described in Bhalla and  
505 Dernburg, 2005. L4 hermaphrodites were allowed to age for 22 h at 20°C. Live worms  
506 were mounted under coverslips on 1.5% agarose pads containing 0.2 mM levamisole for  
507 wild type and moving strains or 0.1 mM levamisole for *dpy* strains. Minimum of 20  
508 germlines were analyzed for each genotype by performing live fluorescence microscopy  
509 and counting the number of cells fully surrounded by CED-1::GFP. All experiments were  
510 performed three times. Significance was assessed using a paired *t*-test.

511

### 512 **Antibodies, immunostaining and microscopy**

513 Immunostaining was performed on worms 20 to 24 f after L4 stage. Gonad dissection  
514 were performed in 1x EBT (250 mM Hepes-Cl, pH 7.4, 1.18 M NaCl, 480 mM KCl, 20  
515 mM EDTA, 5 mM EGTA) + 0.1% Tween 20 and 20 mM sodium azide. An equal volume  
516 of 2% formaldehyde in EBT (final concentration was 1% formaldehyde) was added and  
517 allowed to incubate under coverslip for 5 min. The sample was mounted on HistoBond  
518 slides (75 x 25 x 1 mm from VWR), freeze-cracked, and immediately incubated in  
519 methanol at -20°C for 1 min and transferred to PBST (PBS with Tween20). After a total  
520 of 3 washes of PBST, the samples were incubated for 30 min in 1% bovine serum  
521 albumin diluted in PBST. A hand-cut paraffin square was used to cover the tissue with 50  
522 µL of antibody solution. Incubation was conducted in a humid chamber at 4°C overnight.  
523 Slides were rinsed 3 times in PBST and incubated for 2 h at room temperature with  
524 fluorophore-conjugated secondary antibody solution at a dilution of 1:500. Samples were  
525 rinsed in PBST, DAPI stained in PBST (5 µg/mL) and rinsed a last time in PBST.  
526 Samples were then mounted in 12 µL of mounting media (20 M N-propyl gallate [Sigma-  
527 Aldrich] and 0.14 M Tris in glycerol) with a no. 1.5 (22 mm<sup>2</sup>) coverslip, and sealed with  
528 nail polish.  
529  
530 Primary antibodies were as follows (dilutions are indicated in parentheses). Rabbit anti-  
531 SYP-1 (1:500; MacQueen et al., 2002), chicken anti-HTP-3 (1:250; MacQueen et al.,  
532 2005), rabbit anti-MAD-2 and anti-MAD-1 (1:10000; Essex et al., 2009), mouse anti-  
533 NPC MAb414 (1:5000; Covance; Davis and Blobel, 1986), rat anti-HIM-8 (1:2500;  
534 Phillips and Derburg 2006) and goat anti-GFP (1:10000; Hua et al., 2009) Antibodies  
535 against SYP-1 were provided by A. Villeneuve (Stanford University, Palo Alto, CA).



536 Antibodies against HTP-3 and HIM-8 were provided by A. Dernburg (University of  
537 California Berkley/E.O. Lawrence Berkley National Lab, Berkley, CA). Antibodies  
538 against MAD-1 and MAD-2 were provided by A. Desai (Ludwig Institute/University of  
539 California, San Diego, CA). Antibodies against GFP were provided by S. Strome  
540 (University of California, Santa Cruz, CA).  
541  
542 Secondary antibodies were Cy3, Cy5 and Alexa Fluor 488 anti-mouse, anti-rabbit, anti-  
543 guinea pig, anti-rat and anti-chicken (1:250; Jackson ImmunoResearch Laboratories, Inc.)  
544  
545 Quantification of synapsis was performed with a minimum of three whole germlines per  
546 genotype as in Phillips et al. (2005) on animals 24 h after L4 stage. The gonads were  
547 divided into six equal-sized regions, beginning at the distal tip of the gonad and  
548 progressing through the end or late pachytene.  
549  
550 All images were acquired at room temperature using a Delta-Vision Personal DV  
551 system (GE Healthcare) equipped with a 100x NA 1.4 oil immersion objective  
552 (Olympus), resulting in an effective xy pixel spacing of 0.064 or 0.040  $\mu\text{m}$ . Images were  
553 captured using a charge-coupled device camera (Cool-SNAP HQ; Photometrics). Three-  
554 dimensional images stacks were performed using functions in the softWoRx software  
555 package. Projections were calculated by a maximum intensity algorithm. Composite  
556 images were assembled, and some false coloring was performed with Fiji and Photoshop  
557 software (Adobe).  
558

559 **Live imaging**

560 For time lapse imaging of meiosis, we followed the protocol as described in Wynn et al.,  
561 2012. Briefly, young adult worms (16-20 h after L4 stage) were immobilized on freshly  
562 made 3% agarose pad in a drop of M9 media containing 0.4 mM (0.05%) tetramisole  
563 (Sigma Aldrich) and 3.8 mM (0.5%) tricaine (Sigma Aldrich). A 22 x 22 x 0.17 mm  
564 coverslip (Schott nexterion) was applied after 2 min of immersion in the anesthetic  
565 media. The monolayer of meiotic nuclei closest to the coverslip was imaged and collected  
566 at 20°C or room temperature no longer than 15 min after immersion. Images were  
567 acquired on a Solamere spinning disk confocal system piloted by  $\mu$ Manager software  
568 (Edelstein et al., 2014) and equipped with a Yokogawa CSUX-1 scan head, a Nikon  
569 (Garden City, NY) TE2000-E inverted stand, a Hamamatsu ImageEM x 2 camera,  
570 LX/MAS 489 nm laser attenuated to 10%, and a Plan Apo x 60/1.4 numerical aperture oil  
571 objective.

572

573 For 2D confocal imaging, a focal plane near apical surface of many nuclei was imaged to  
574 50-100 ms exposure at 489 nm with images acquisition every 400 ms for  $\leq 80$  s. These  
575 settings were used for rapid chromosome movements collection data.

576

577 For quantification and size measurement of SUN-1-mRuby patches, we imaged the first  
578 layer of nuclei in live worms. We exposed the germlines at 489 nm for 50-100 ms.

579

580 **Processive chromosome movements detection**

581 We determined processive chromosome movements as when a SUN-1-mRuby patch  
582 moved in a continuous direction with a speed over 0.4  $\mu\text{m}/\text{sec}$  for at least 3 consecutive  
583 time points (1.2 sec), as defined by (Wynne et al., 2012).

584

## 585 **ACKNOWLEDGEMENTS**

586

587 We would like to thank Pablo Lara-Gonzalez, Arshad Desai, Karen Oegema, Abby  
588 Dernburg, and Anne Villeneuve for valuable strains and reagents. This work was  
589 supported by the NIH (grant number R01GM097144 [N.B.]). Some strains were provided  
590 by the CGC, which is funded by NIH Office of Research Infrastructure Programs (P40  
591 OD010440).

592

## 593 **Author Contributions**

594

595 Conceptualization and Methodology, A.D. and N.B.; Investigation, A.D.; Writing -  
596 Original Draft, A.D. and N.B.; Writing - Review & Editing, A.D. and N.B.; Supervision  
597 and Funding Acquisition, N.B.

598

## 599 **Declaration of Interests**

600

601 The authors declare no competing interests.

602

603

604 **REFERENCES**

- 605 Baudrimont, A., Penkner, A., Woglar, A., Machacek, T., Wegrostek, C., Gloggnitzer, J.,  
606 Fridkin, A., Klein, F., Gruenbaum, Y., Pasierbek, P., et al. (2010). Leptotene/Zygotene  
607 Chromosome Movement Via the SUN/KASH Protein Bridge in *Caenorhabditis elegans*.  
608 *PLOS Genetics* 6, e1001219.
- 609 Bhalla, N., and Dernburg, A.F. (2005). A Conserved Checkpoint Monitors Meiotic  
610 Chromosome Synapsis in *Caenorhabditis elegans*. *Science* 310, 1683–1686.
- 611 Bhalla, N., and Dernburg, A.F. (2008). Prelude to a Division. *Annu Rev Cell Dev Biol*  
612 24, 397–424.
- 613 Bohr, T., Nelson, C.R., Klee, E., and Bhalla, N. (2015). Spindle assembly checkpoint  
614 proteins regulate and monitor meiotic synapsis in *C. elegans*. *J Cell Biol* 211, 233–242.
- 615 Chen, R.H., Waters, J.C., Salmon, E.D., and Murray, A.W. (1996). Association of spindle  
616 assembly checkpoint component X MAD2 with unattached kinetochores. *Science* 274,  
617 242–246.
- 618 Chen, R.H., Shevchenko, A., Mann, M., and Murray, A.W. (1998). Spindle checkpoint  
619 protein Xmad1 recruits Xmad2 to unattached kinetochores. *J. Cell Biol.* 143, 283–295.
- 620 Choi, E., Zhang, X., Xing, C., and Yu, H. (2016). Mitotic Checkpoint Regulators Control  
621 Insulin Signaling and Metabolic Homeostasis. *Cell* 166, 567–581.
- 622 De Antoni, A., Pearson, C.G., Cimini, D., Canman, J.C., Sala, V., Nezi, L., Mapelli, M.,  
623 Sironi, L., Faretta, M., Salmon, E.D., et al. (2005). The Mad1/Mad2 complex as a

624 template for Mad2 activation in the spindle assembly checkpoint. *Curr. Biol.* *15*, 214–  
625 225.

626 DeAntoni, A., Sala, V., and Musacchio, A. (2005). Explaining the oligomerization  
627 properties of the spindle assembly checkpoint protein Mad2. *Philos Trans R Soc Lond B*  
628 *Biol Sci* *360*, 637–647, discussion 447-448.

629 Dernburg, A.F., McDonald, K., Moulder, G., Barstead, R., Dresser, M., and Villeneuve,  
630 A.M. (1998). Meiotic recombination in *C. elegans* initiates by a conserved mechanism  
631 and is dispensable for homologous chromosome synapsis. *Cell* *94*, 387–398.

632 Derry, W.B., Putzke, A.P., and Rothman, J.H. (2001). *Caenorhabditis elegans* p53: role in  
633 apoptosis, meiosis, and stress resistance. *Science* *294*, 591–595.

634 Deshong, A.J., Ye, A.L., Lamelza, P., and Bhalla, N. (2014). A Quality Control  
635 Mechanism Coordinates Meiotic Prophase Events to Promote Crossover Assurance.  
636 *PLoS Genet* *10*.

637 Giacomazzi, S., Vong, D., Devigne, A., and Bhalla, N. (2020). PCH-2 collaborates with  
638 CMT-1 to proofread meiotic homolog interactions. *PLoS Genet* *16*, e1008904.

639 Harper, N.C., Rillo, R., Jover-Gil, S., Assaf, Z.J., Bhalla, N., and Dernburg, A.F. (2011).  
640 Pairing centers recruit a Polo-like kinase to orchestrate meiotic chromosome dynamics in  
641 *C. elegans*. *Dev Cell* *21*, 934–947.

642 Labrador, L., Barroso, C., Lightfoot, J., Müller-Reichert, T., Flibotte, S., Taylor, J.,  
643 Moerman, D.G., Villeneuve, A.M., and Martinez-Perez, E. (2013). Chromosome

- 644 Movements Promoted by the Mitochondrial Protein SPD-3 Are Required for Homology  
645 Search during *Caenorhabditis elegans* Meiosis. *PLoS Genet* 9.
- 646 Lara-Gonzalez, P., Westhorpe, F.G., and Taylor, S.S. (2012). The spindle assembly  
647 checkpoint. *Curr Biol* 22, R966-980.
- 648 Lara-Gonzalez, P., Moyle, M.W., Budrewicz, J., Mendoza-Lopez, J., Oegema, K., and  
649 Desai, A. (2019). The G2-to-M Transition Is Ensured by a Dual Mechanism that Protects  
650 Cyclin B from Degradation by Cdc20-Activated APC/C. *Developmental Cell* 51, 313-  
651 325.e10.
- 652 Lara-Gonzalez, P., Kim, T., Oegema, K., Corbett, K., and Desai, A. (2021). A tripartite  
653 mechanism catalyzes Mad2-Cdc20 assembly at unattached kinetochores. *Science* 371,  
654 64–67.
- 655 Li, Y., and Benezra, R. (1996). Identification of a human mitotic checkpoint gene:  
656 hsMAD2. *Science* 274, 246–248.
- 657 Luo, X., Tang, Z., Rizo, J., and Yu, H. (2002). The Mad2 spindle checkpoint protein  
658 undergoes similar major conformational changes upon binding to either Mad1 or Cdc20.  
659 *Mol. Cell* 9, 59–71.
- 660 Luo, X., Tang, Z., Xia, G., Wassmann, K., Matsumoto, T., Rizo, J., and Yu, H. (2004).  
661 The Mad2 spindle checkpoint protein has two distinct natively folded states. *Nat. Struct.*  
662 *Mol. Biol.* 11, 338–345.

- 663 MacQueen, A.J., and Hochwagen, A. (2011). Checkpoint mechanisms: the puppet  
664 masters of meiotic prophase. *Trends in Cell Biology* *21*, 393–400.
- 665 MacQueen, A.J., Colaiácovo, M.P., McDonald, K., and Villeneuve, A.M. (2002).  
666 Synapsis-dependent and -independent mechanisms stabilize homolog pairing during  
667 meiotic prophase in *C. elegans*. *Genes Dev* *16*, 2428–2442.
- 668 MacQueen, A.J., Phillips, C.M., Bhalla, N., Weiser, P., Villeneuve, A.M., and Dernburg,  
669 A.F. (2005). Chromosome Sites Play Dual Roles to Establish Homologous Synapsis  
670 during Meiosis in *C. elegans*. *Cell* *123*, 1037–1050.
- 671 Moyle, M.W., Kim, T., Hattersley, N., Espeut, J., Cheerambathur, D.K., Oegema, K., and  
672 Desai, A. (2014). A Bub1–Mad1 interaction targets the Mad1–Mad2 complex to  
673 unattached kinetochores to initiate the spindle checkpoint. *J Cell Biol* *204*, 647–657.
- 674 Nelson, C.R., Hwang, T., Chen, P.-H., and Bhalla, N. (2015). TRIP13PCH-2 promotes  
675 Mad2 localization to unattached kinetochores in the spindle checkpoint response. *J Cell*  
676 *Biol* *211*, 503–516.
- 677 Nezi, L., Rancati, G., De Antoni, A., Pasqualato, S., Piatti, S., and Musacchio, A. (2006).  
678 Accumulation of Mad2-Cdc20 complex during spindle checkpoint activation requires  
679 binding of open and closed conformers of Mad2 in *Saccharomyces cerevisiae*. *J. Cell*  
680 *Biol.* *174*, 39–51.
- 681 Penkner, A., Portik-Dobos, Z., Tang, L., Schnabel, R., Novatchkova, M., Jantsch, V., and  
682 Loidl, J. (2007). A conserved function for a *Caenorhabditis elegans* Com1/Sae2/CtIP  
683 protein homolog in meiotic recombination. *EMBO J* *26*, 5071–5082.

684 Rodriguez-Bravo, V., Maciejowski, J., Corona, J., Buch, H.K., Collin, P., Kanemaki,  
685 M.T., Shah, J.V., and Jallepalli, P.V. (2014). Nuclear pores protect genome integrity by  
686 assembling a premitotic and Mad1-dependent anaphase inhibitor. *Cell* *156*, 1017–1031.

687 Rog, O., and Dernburg, A.F. (2015). Direct Visualization Reveals Kinetics of Meiotic  
688 Chromosome Synapsis. *Cell Reports* *10*, 1639–1645.

689 Rosenberg, S.C., and Corbett, K.D. (2015). The multifaceted roles of the HORMA  
690 domain in cellular signaling. *J Cell Biol* *211*, 745–755.

691 Sato, A., Isaac, B., Phillips, C.M., Rillo, R., Carlton, P.M., Wynne, D.J., Kasad, R.A.,  
692 and Dernburg, A.F. (2009). Cytoskeletal forces span the nuclear envelope to coordinate  
693 meiotic chromosome pairing and synapsis. *Cell* *139*, 907–919.

694 Schumacher, B., Hofmann, K., Boulton, S., and Gartner, A. (2001). The *C. elegans*  
695 homolog of the p53 tumor suppressor is required for DNA damage-induced apoptosis.  
696 *Curr Biol* *11*, 1722–1727.

697 Sironi, L., Melixetian, M., Faretta, M., Prosperini, E., Helin, K., and Musacchio, A.  
698 (2001). Mad2 binding to Mad1 and Cdc20, rather than oligomerization, is required for the  
699 spindle checkpoint. *EMBO J.* *20*, 6371–6382.

700 Sironi, L., Mapelli, M., Knapp, S., De Antoni, A., Jeang, K.-T., and Musacchio, A.  
701 (2002). Crystal structure of the tetrameric Mad1-Mad2 core complex: implications of a  
702 “safety belt” binding mechanism for the spindle checkpoint. *EMBO J.* *21*, 2496–2506.



703 Stein, K.K., Davis, E.S., Hays, T., and Golden, A. (2007). Components of the Spindle  
704 Assembly Checkpoint Regulate the Anaphase-Promoting Complex During Meiosis in  
705 *Caenorhabditis elegans*. *Genetics* *175*, 107–123.

706 Stevens, D., Oegema, K., and Desai, A. (2013). Meiotic double-strand breaks uncover  
707 and protect against mitotic errors in the *C. elegans* germline. *Curr. Biol.* *23*, 2400–2406.

708 Wynne, D.J., Rog, O., Carlton, P.M., and Dernburg, A.F. (2012). Dynein-dependent  
709 processive chromosome motions promote homologous pairing in *C. elegans* meiosis. *J*  
710 *Cell Biol* *196*, 47–64.

711 Yamamoto, T.G., Watanabe, S., Essex, A., and Kitagawa, R. (2008). SPDL-1 functions  
712 as a kinetochore receptor for MDF-1 in *Caenorhabditis elegans*. *J. Cell Biol.* *183*, 187–  
713 194.

714 Zhang, W., Miley, N., Zastrow, M.S., MacQueen, A.J., Sato, A., Nabeshima, K.,  
715 Martinez-Perez, E., Mlynarczyk-Evans, S., Carlton, P.M., and Villeneuve, A.M. (2012).  
716 HAL-2 Promotes Homologous Pairing during *Caenorhabditis elegans* Meiosis by  
717 Antagonizing Inhibitory Effects of Synaptonemal Complex Precursors. *PLoS Genet* *8*.

718  
719  
720  
721  
722  
723

724 **Figure Legends**

725

726 **Figure 1: Spindle assembly checkpoint mutants affects progressive chromosome**

727 **movements.** A. Processive chromosome movements occur at lower frequency in *mad-*

728 *l(av19)* and *bub-3* mutants. A \*\* indicates p value < 0.01 and ns indicates not significant.

729 n indicated the number of nuclei analyzed. B. Images of SUN-1-mRuby patches and

730 associated tracks of patch movement in wild type, *mad-1* and *bub-3* mutants. Arrows

731 indicate tracked patches of SUN-1-mRuby. Bar: 1  $\mu$ m.

732

733 **Figure 2: MAD-1's localization to nuclear envelope is required for the synapsis**

734 **checkpoint but not to regulate synapsis.** A.  $\Delta$ N-MAD-1 (green) localizes diffusely in

735 the cytoplasm of meiotic nuclei and does not co-localize with NPCs (red). Images are

736 partial projections of meiotic nuclei stained to visualize DNA (blue). Bar: 2  $\mu$ m.

737 B. A cartoon of meiotic checkpoints in *C. elegans*. C.  $\Delta$ N-*mad-1* reduces germline

738 apoptosis in *syp-1* and *spo-11*; *syp-1* mutants. A \*\*\* indicates p value < 0.0001. D.

739 synapsis is unaffected in  $\Delta$ N-*mad-1* mutants. ns indicates not significant. E. Images of

740 nuclei during synapsis initiation in wild-type worms and  $\Delta$ N-*ter-mad-1* mutants stained to

741 visualize SYP-1 and HTP-3. Arrows indicates unsynapsed chromosomes. Bar: 5  $\mu$ m.

742

743 **Figure 3: MAD-1 is not required for MAD-2's localization to the nuclear envelop in**

744 **meiotic germline nuclei.** MAD-2 (green) co-localizes with NPCs (red) in  $\Delta$ N-*mad-1* and

745 *bub-3* mutants but is not detected in *mad-1(av19)*, *mad-1(gk2)* and *mad-2(tm2190)*

746 mutants. Images are partial projections of meiotic nuclei stained to visualize DNA (blue).

747 Bar: 2  $\mu$ m.

748

749 **Figure 4: MAD-1's interaction with BUB-1 is not required to monitor or regulate**

750 **synapsis.** A. MAD-1 (green) co-localizes with NPCs (red) in *mad-1(AAA)* mutants.

751 Images are partial projections of meiotic nuclei stained to visualize DNA (blue). Bar: 2

752  $\mu$ m. B. MAD-2 (green) co-localizes with NPCs (red) in *mad-1(AAA)* mutants. Images are

753 partial projections of meiotic nuclei stained to visualize DNA (blue). Bar: 2  $\mu$ m. C. The

754 synapsis checkpoint and the DNA damage checkpoint are unperturbed in *mad-1(AAA)*

755 mutants. D. synapsis is unaffected in *mad-1(AAA)* mutants. ns indicates not significant. E.

756 Images of nuclei during synapsis initiation in wild-type and *mad-1(AAA)* mutants stained

757 to visualize SYP-1 and HTP-3. Arrow indicates unsynapsed chromosomes. Bar: 5  $\mu$ m.

758

759 **Figure 5: MAD-1's ability to interact with MAD-2 is required to regulate and**

760 **monitor synapsis.** A. MAD-1(A) localizes at the nuclear periphery. B. MAD-2 (green)

761 does not co-localize with NPCs (red) at the nuclear periphery in *mad-1(A)* mutants.

762 Images are partial projections of meiotic nuclei stained to visualize DNA (blue). Bar: 2

763  $\mu$ m. B. *mad-1(A)* reduces germline apoptosis in *syp-1* and *spo-11;syp-1* mutants. A \*\*\*

764 indicates p value < 0.0001. C. Synapsis is reduced and delayed in *mad-1(A)* mutants. D.

765 Images of nuclei during synapsis initiation in wild-type and *mad-1(A)* mutants stained to

766 visualize SYP-1 and HTP-3. Arrows indicates unsynapsed chromosomes. Bar: 5  $\mu$ m.

767

768 **Figure 6: MAD-2's ability to adopt the closed conformation is required to regulate**  
769 **and monitor synapsis.** A. MAD-2 (green) does not co-localize with NPCs (red) at the  
770 nuclear periphery when the protein is locked in the open conformation. Images are partial  
771 projections of meiotic nuclei stained to visualize DNA (blue). Bar: 2  $\mu$ m. B. *mad-2-open*  
772 reduces germline apoptosis in *syp-1* and *cep-1;syp-1* mutants. A \*\*\* indicates p value <  
773 0.0001. C. Synapsis is reduced and delayed when Mad2 is locked in open conformation.  
774 A \*\*\* indicates p value < 0.0001. D. Images of nuclei during synapsis initiation in wild-  
775 type and *mad-2-open* mutants stained to visualize SYP-1 and HTP-3. Arrows indicates  
776 unsynapsed chromosomes. Bar: 5  $\mu$ m.

777

778 **Figure S1: Summary of *mad-1* mutants studied in this paper.** A. Cartoon of the  
779 different *mad-1* mutants studied in this paper. B. Summary of observed phenotypes.

780

781 **Figure S2: Aneuploidy is observed in *mad-2-open* but not *mad-1(A)* mutants.**

782 A. Meiotic nuclei exhibit aneuploidy in *mad-2-open* mutants but not in *mad-1(A)*  
783 mutants. B. Example of nuclei exhibiting aneuploidy in *mad-2-open* mutants. Images are  
784 projections of meiotic nuclei stained to visualize DNA (blue) and HIM-8 protein (red).  
785 Arrows indicates nuclei with no HIM-8 foci.

786

787 **Figure S3: *mad-2-open* mutants activate the DNA damage checkpoint.** *cep-1* reduces  
788 apoptosis in *mad-2-open* mutants. A \*\*\* indicates p value < 0.0001 and ns indicates not  
789 significant.

790

791 **Video Legends**

792

793 **Video 1:** Movement of a SUN-1-mRuby patch and its trajectory in a control nucleus.

794 Movie is displayed at 10 frames per second.

795

796 **Video 2:** Movement of a SUN-1-mRuby patch and its trajectory in a *mad-1* mutant

797 nucleus. Movie is displayed at 10 frames per seconds.

798

799 **Video 3:** Movement of a SUN-1-mRuby patch and its trajectory in a *bub-3* mutant

800 nucleus. Movie is displayed at 10 frames per seconds.

801

Figure 1

A

|                                                                    | Wild type<br>(n=8) | <i>mad-1(av19)</i><br>(n=10) | <i>bub-3</i><br>(n=10) |
|--------------------------------------------------------------------|--------------------|------------------------------|------------------------|
| Average number of Sun-1-mRuby patch per nuclei                     | 4 to 6             | 4 to 6                       | 4 to 6                 |
| Average size of Sun-1-mRuby patch ( $\mu\text{m}$ )                | $0.65 \pm 0.25$    | $0.63 \pm 0.15$              | $0.58 \pm 0.07$        |
| % Rapid Chromosome Movements                                       | $13.6 \pm 3.48$    | $4.44 \pm 2.41$ **           | $3.88 \pm 2.10$ **     |
| Average run length per Rapid Chromosome Movement ( $\mu\text{m}$ ) | $1.01 \pm 0.51$    | $1.21 \pm 0.51$ ns           | $0.93 \pm 0.18$ ns     |

bioRxiv preprint doi: <https://doi.org/10.1101/2021.05.14.444130>; this version posted May 14, 2021. The copyright holder for this preprint (which was not certified by peer review) is the author/funder, who has granted bioRxiv a license to display the preprint in perpetuity. It is made available under aCC-BY 4.0 International license.

B

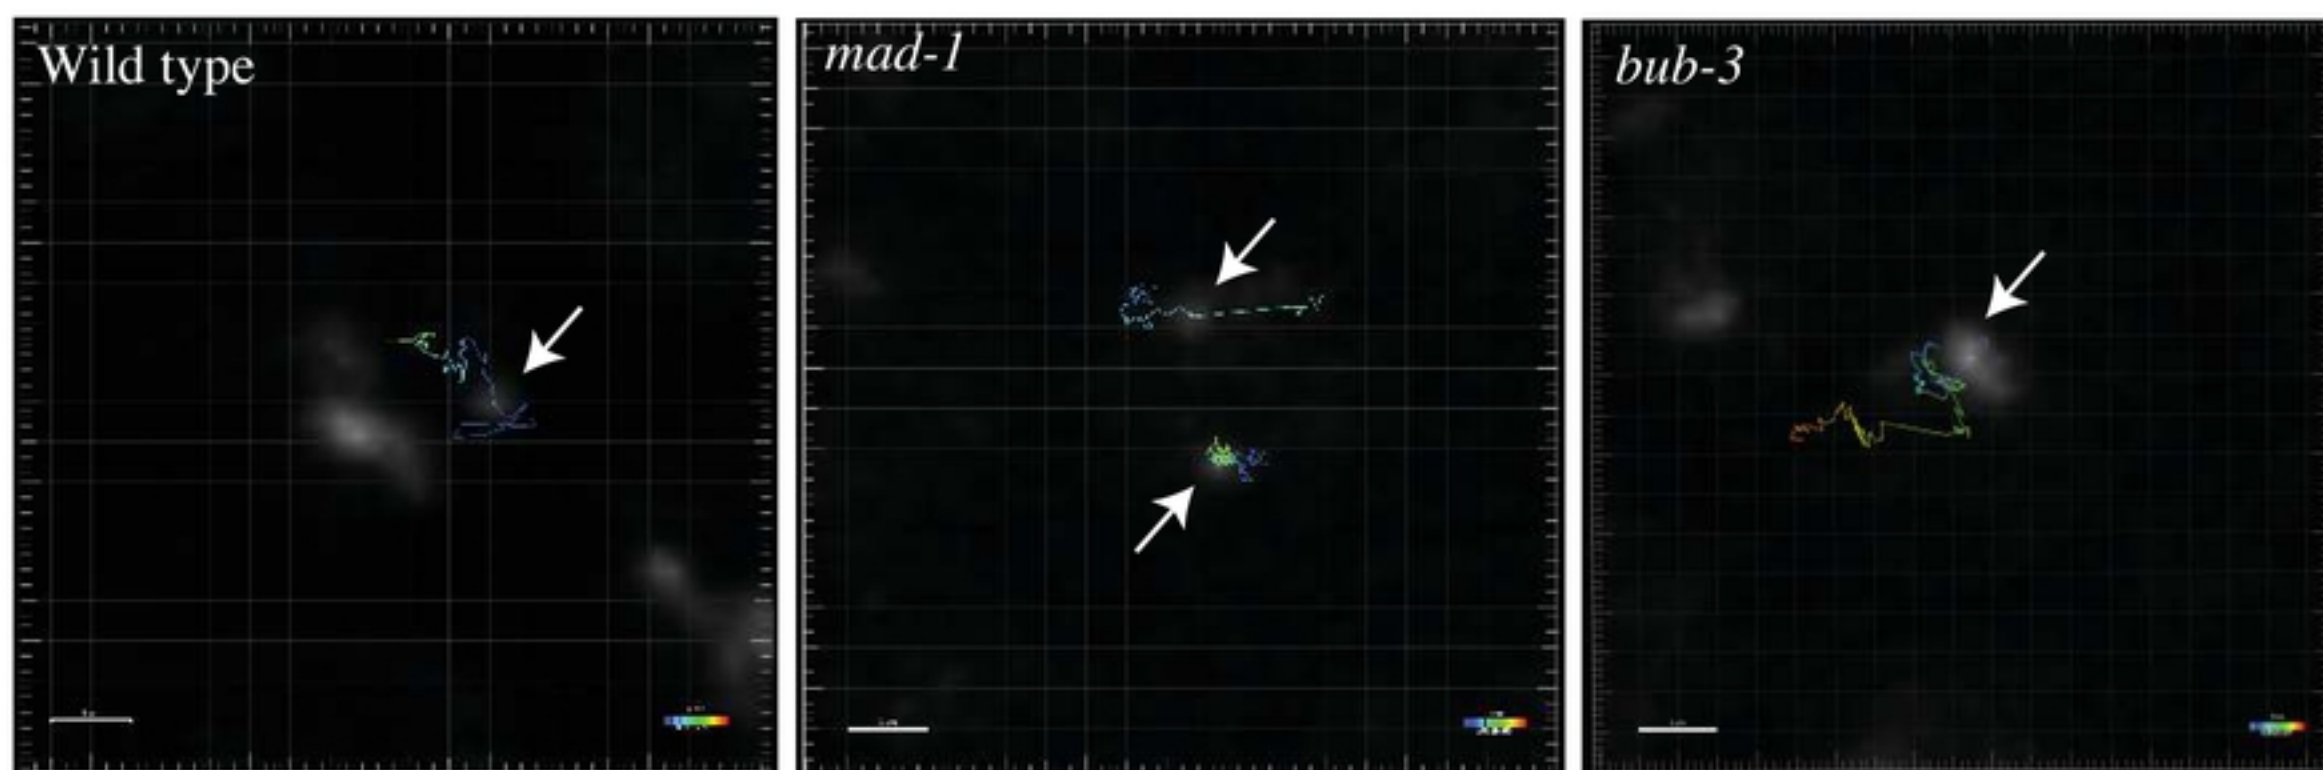

Figure

Figure 2

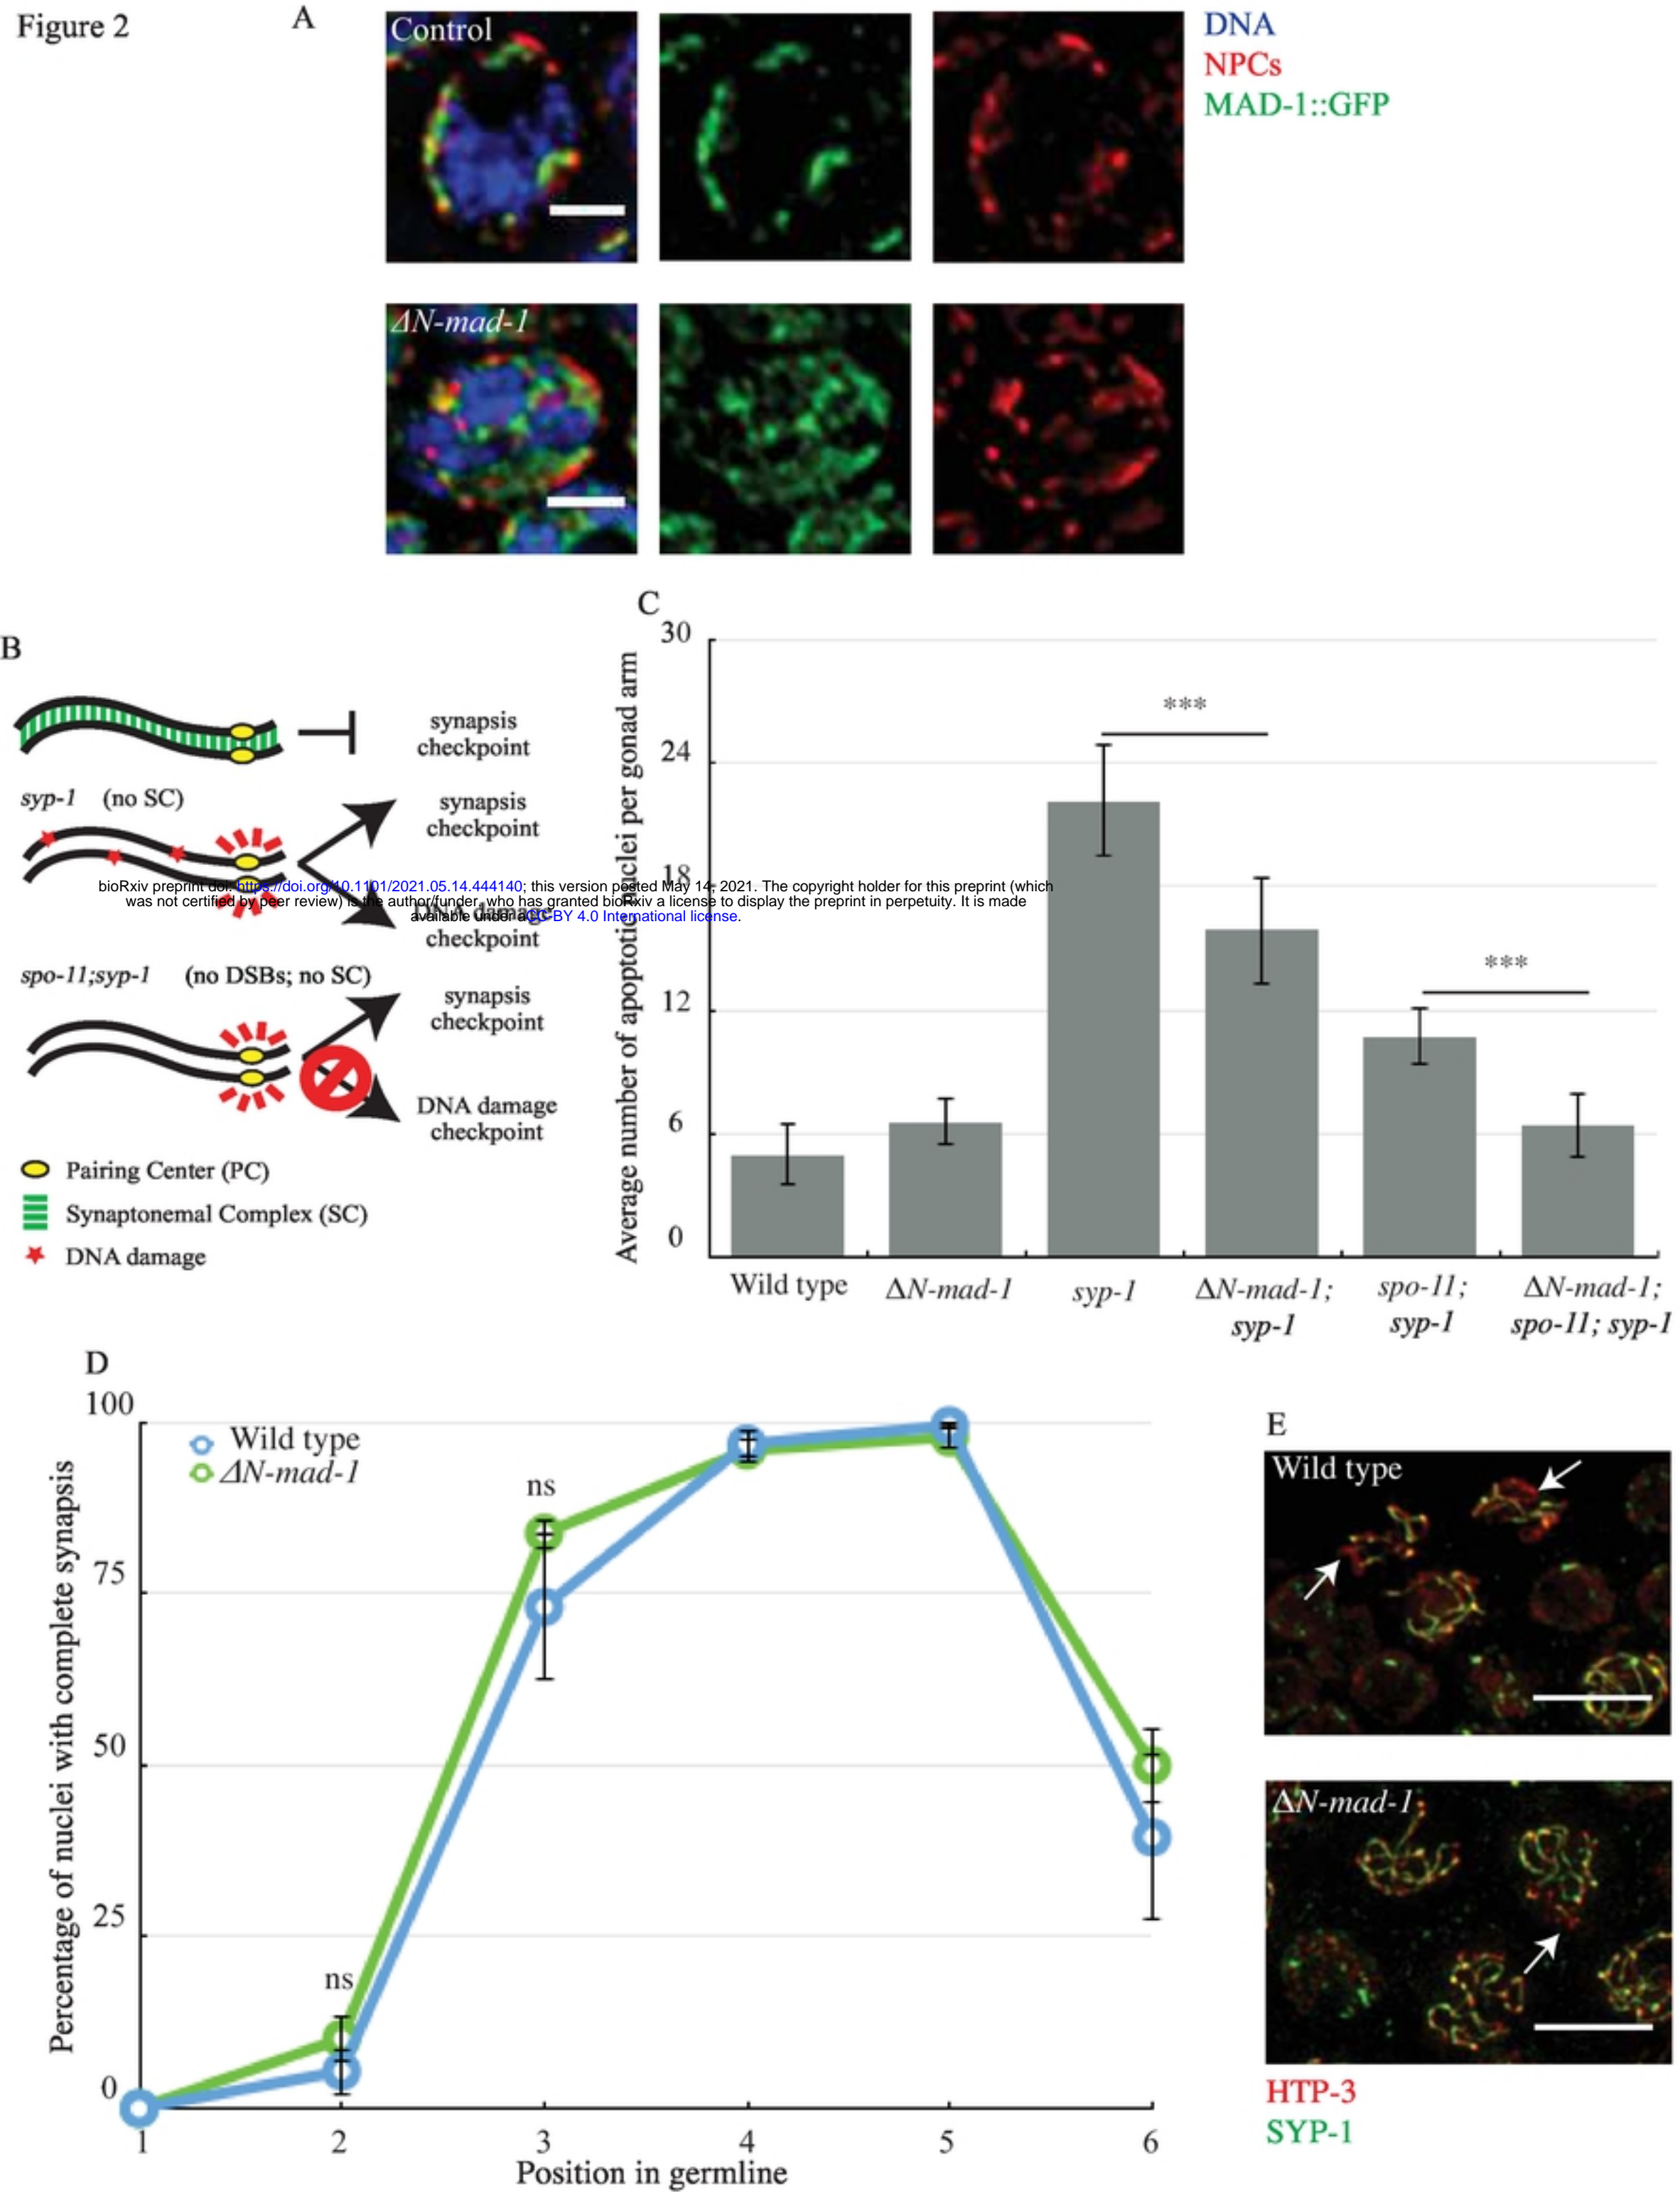

Figure

Figure 3

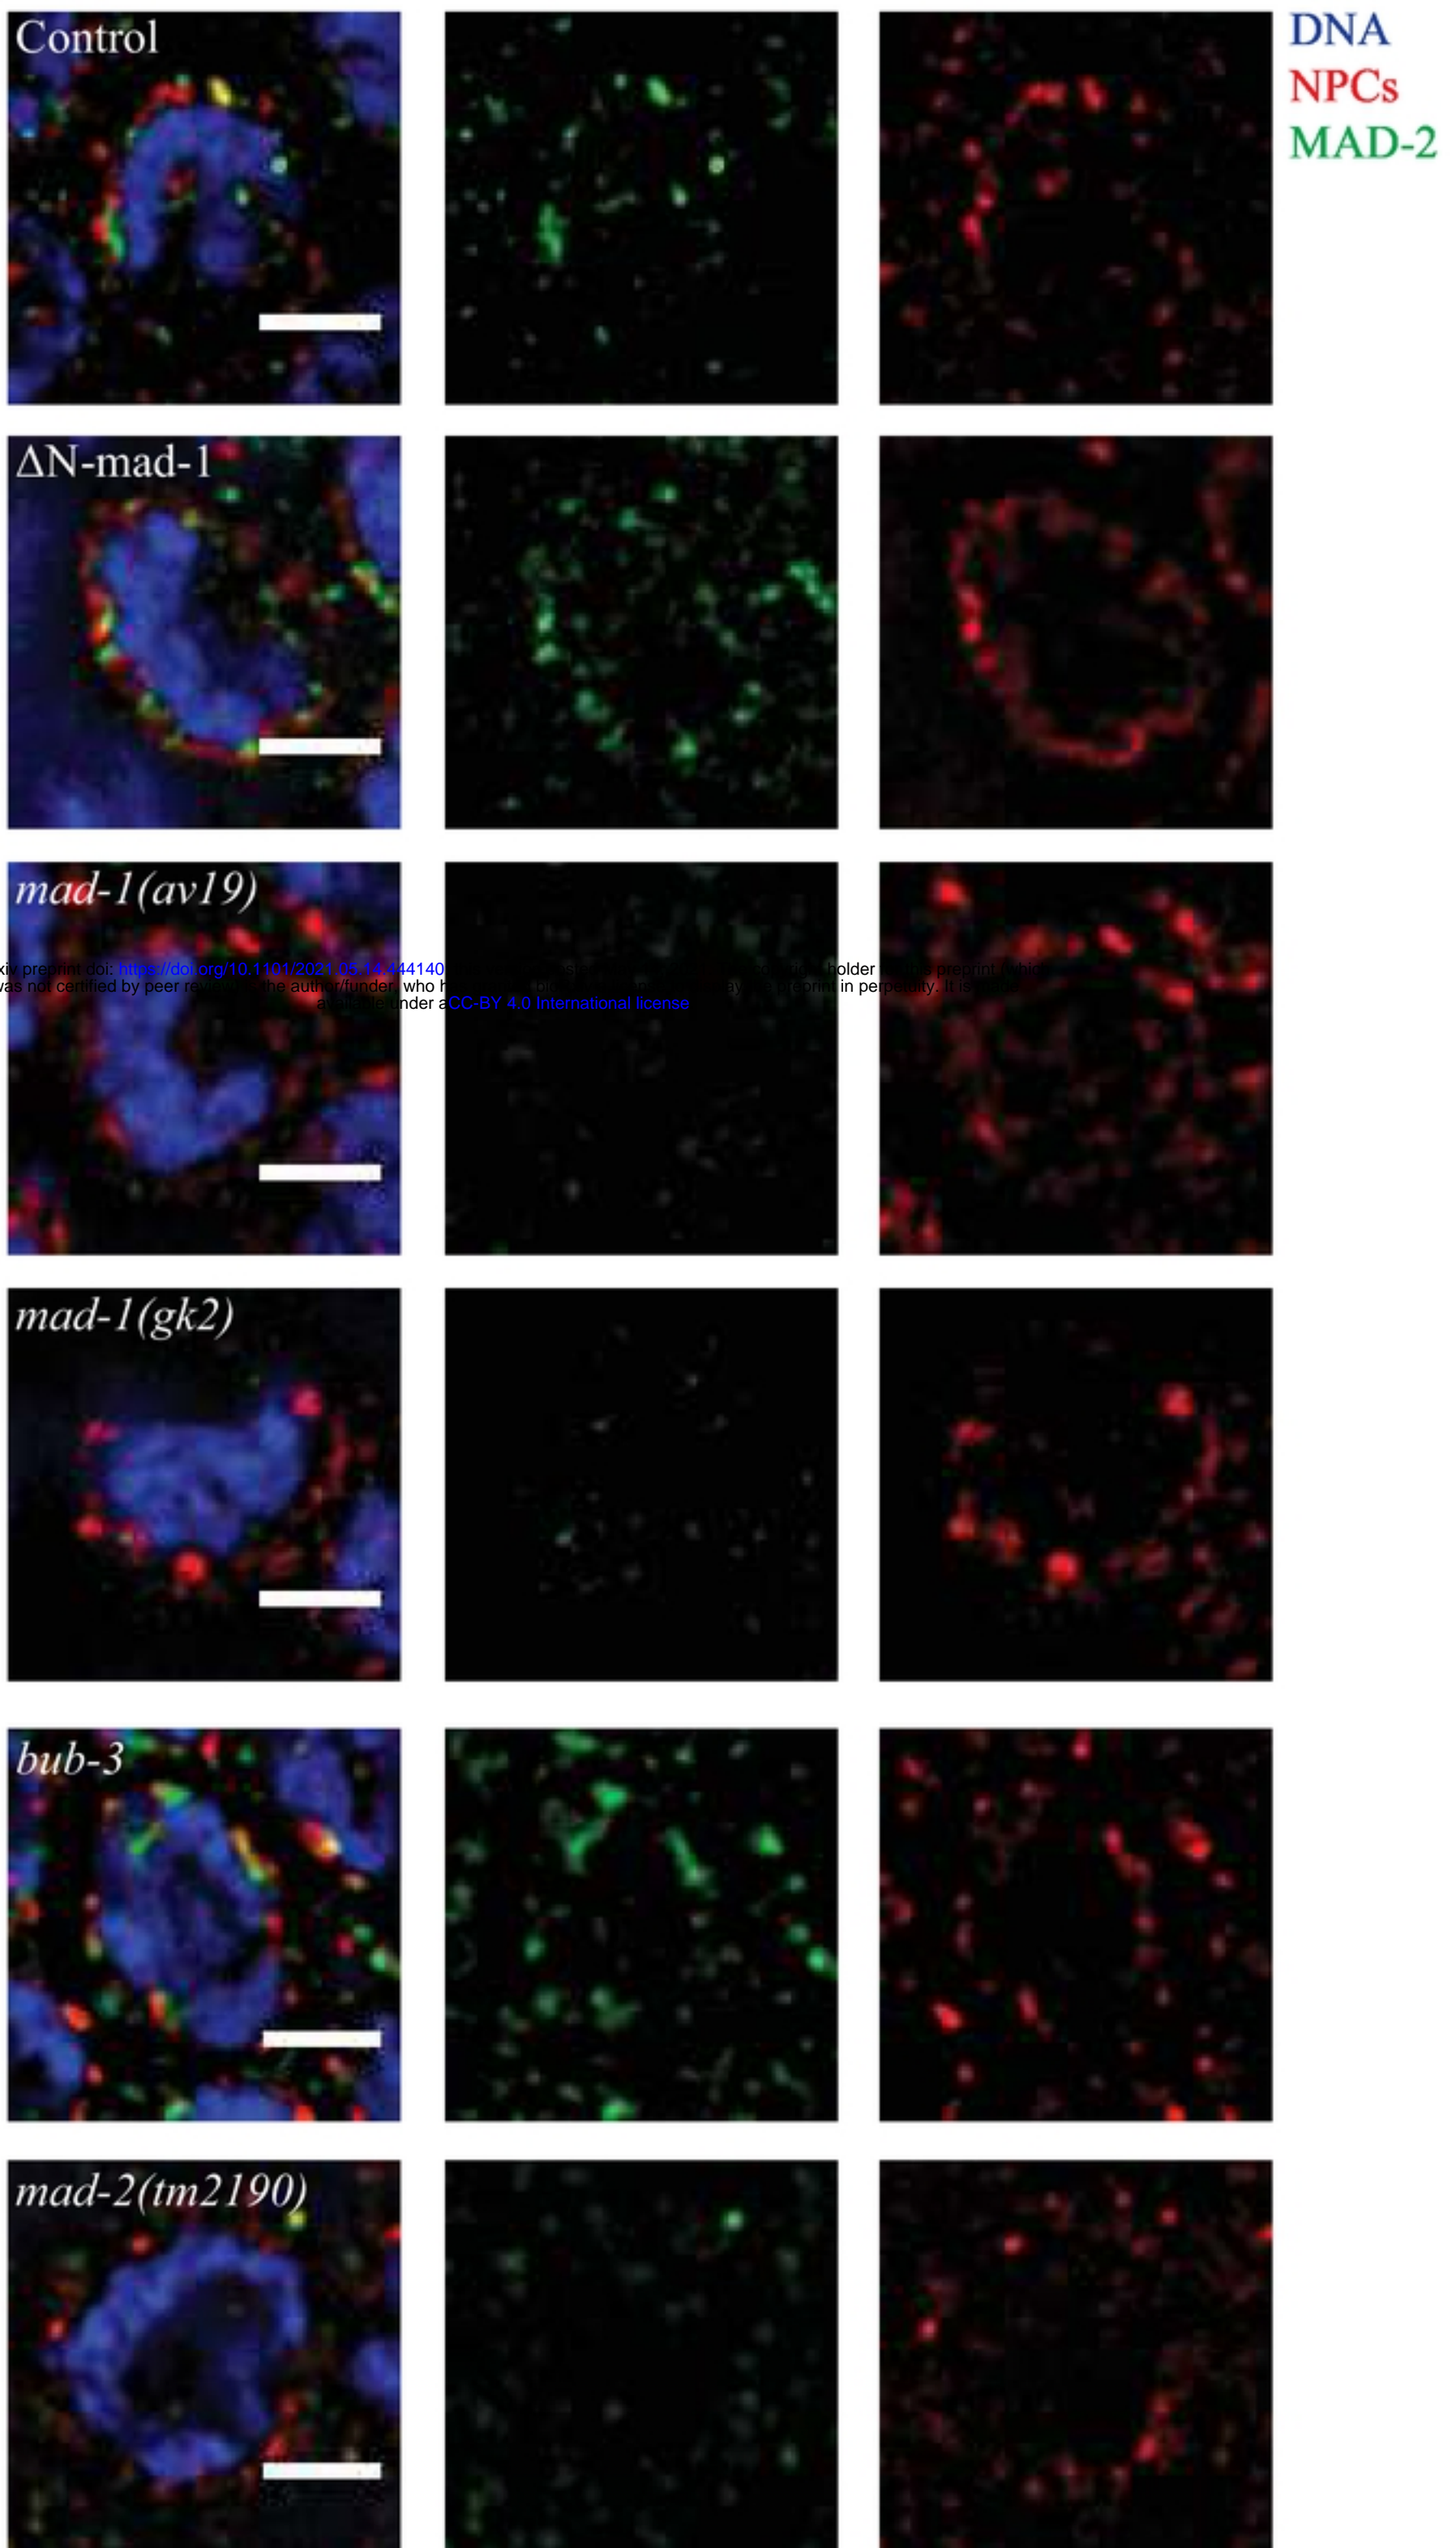

bioRxiv preprint doi: <https://doi.org/10.1101/2021.05.14.444140>; this version posted May 14, 2021. The copyright holder for this preprint (which was not certified by peer review) is the author/funder, who has granted bioRxiv a license to display the preprint in perpetuity. It is made available under aCC-BY 4.0 International license.

Figure



Figure 4

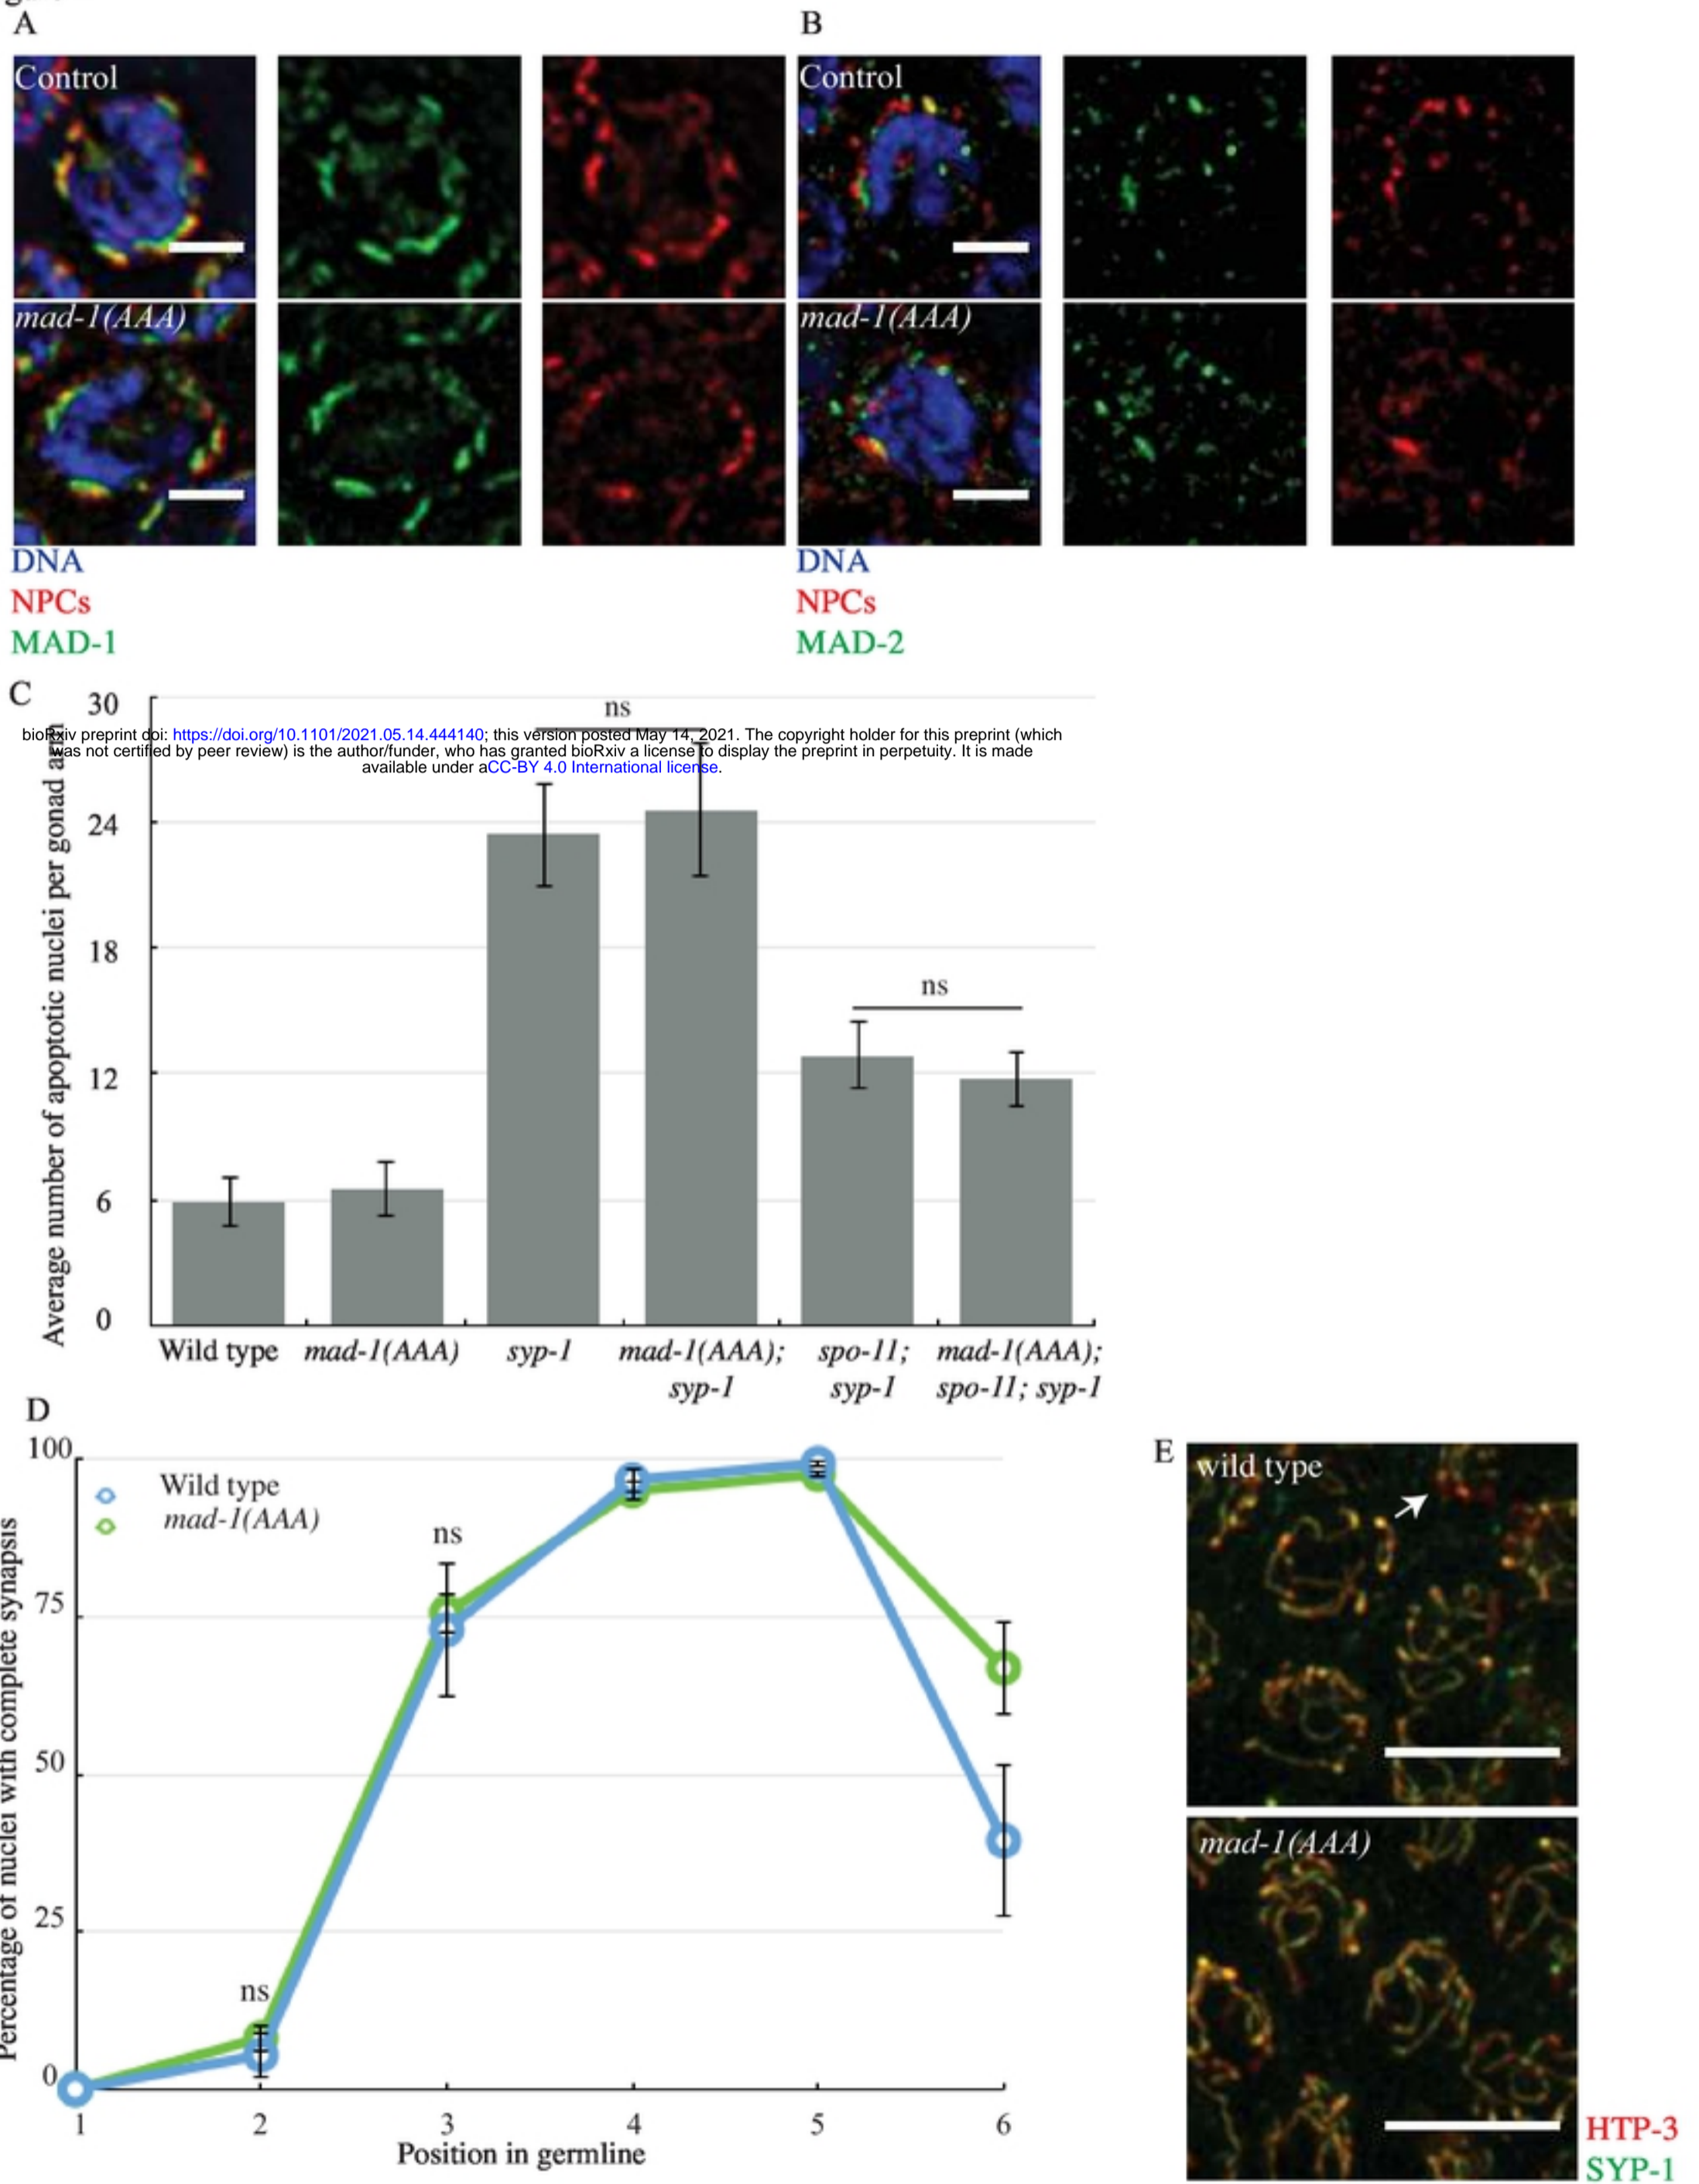

Figure

Figure 5

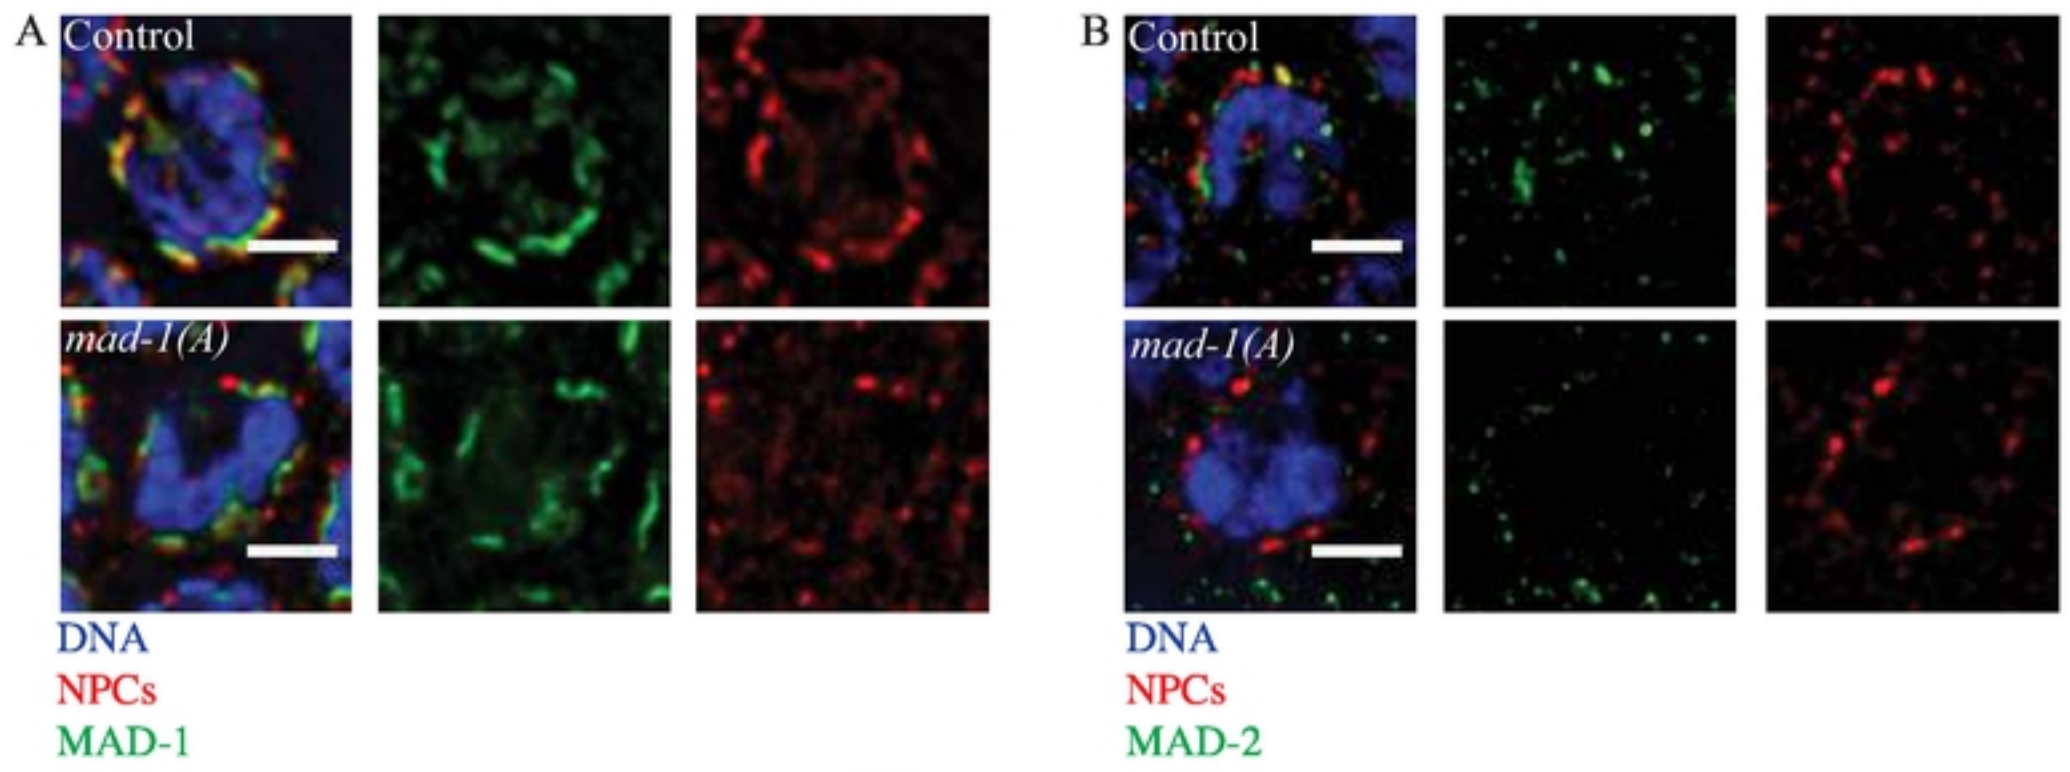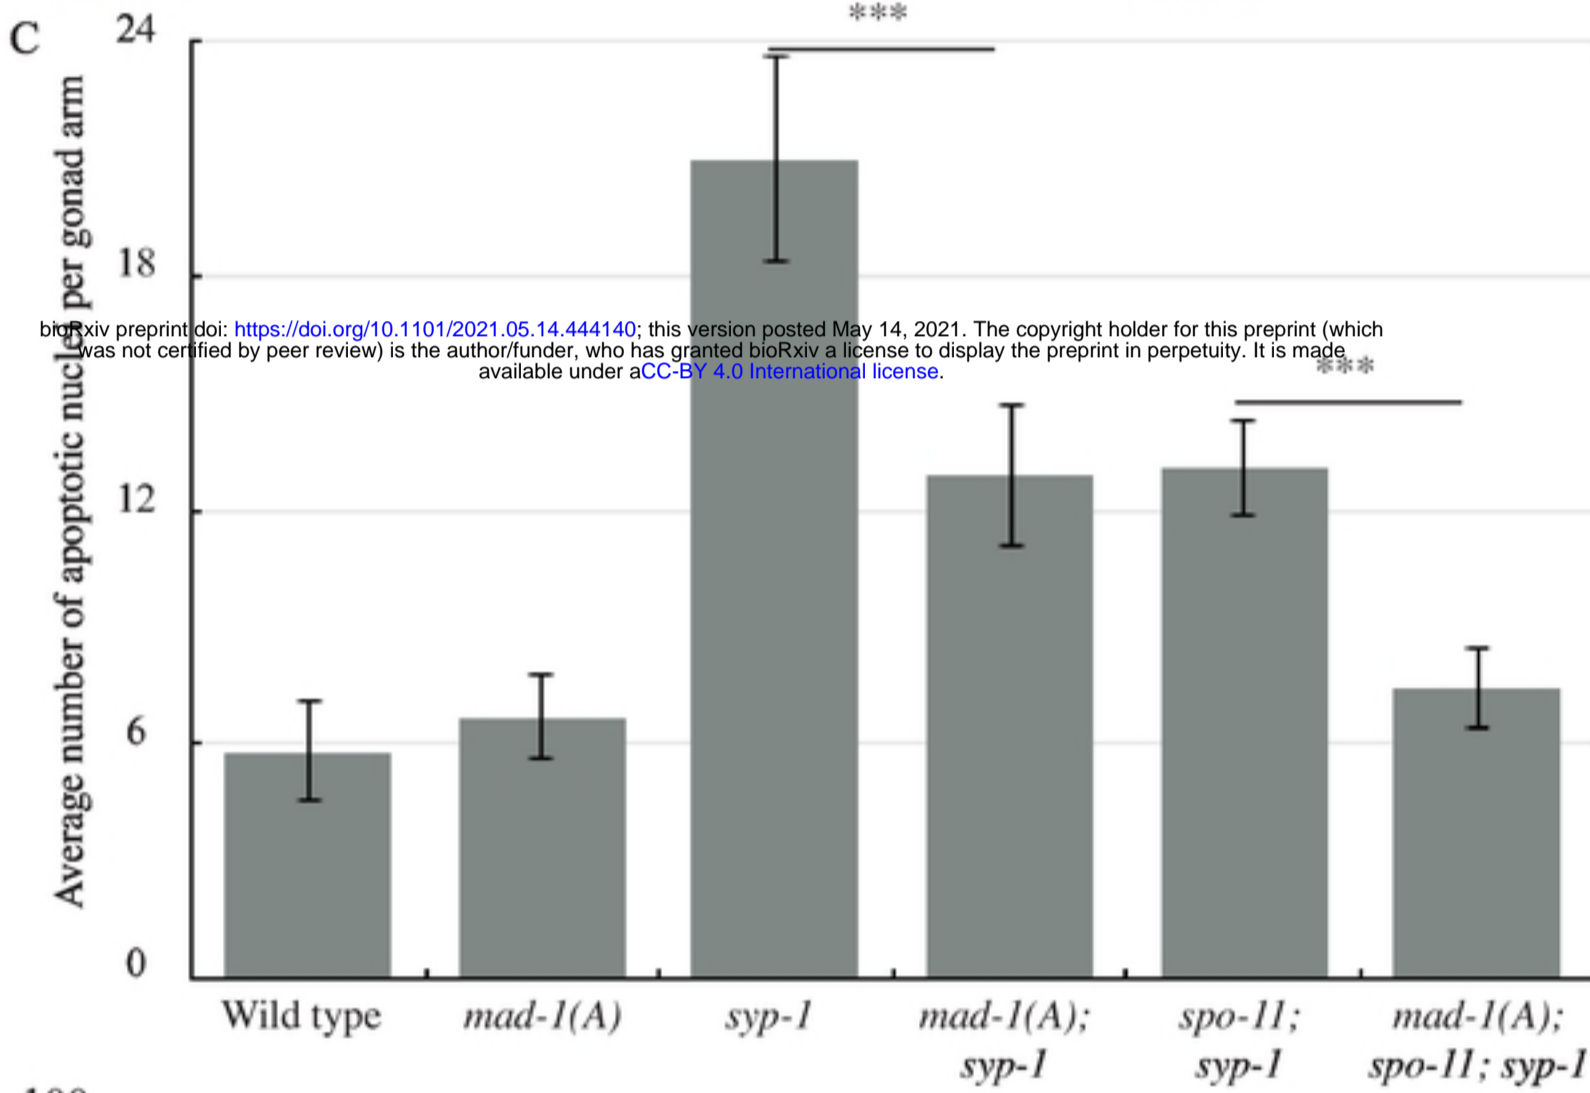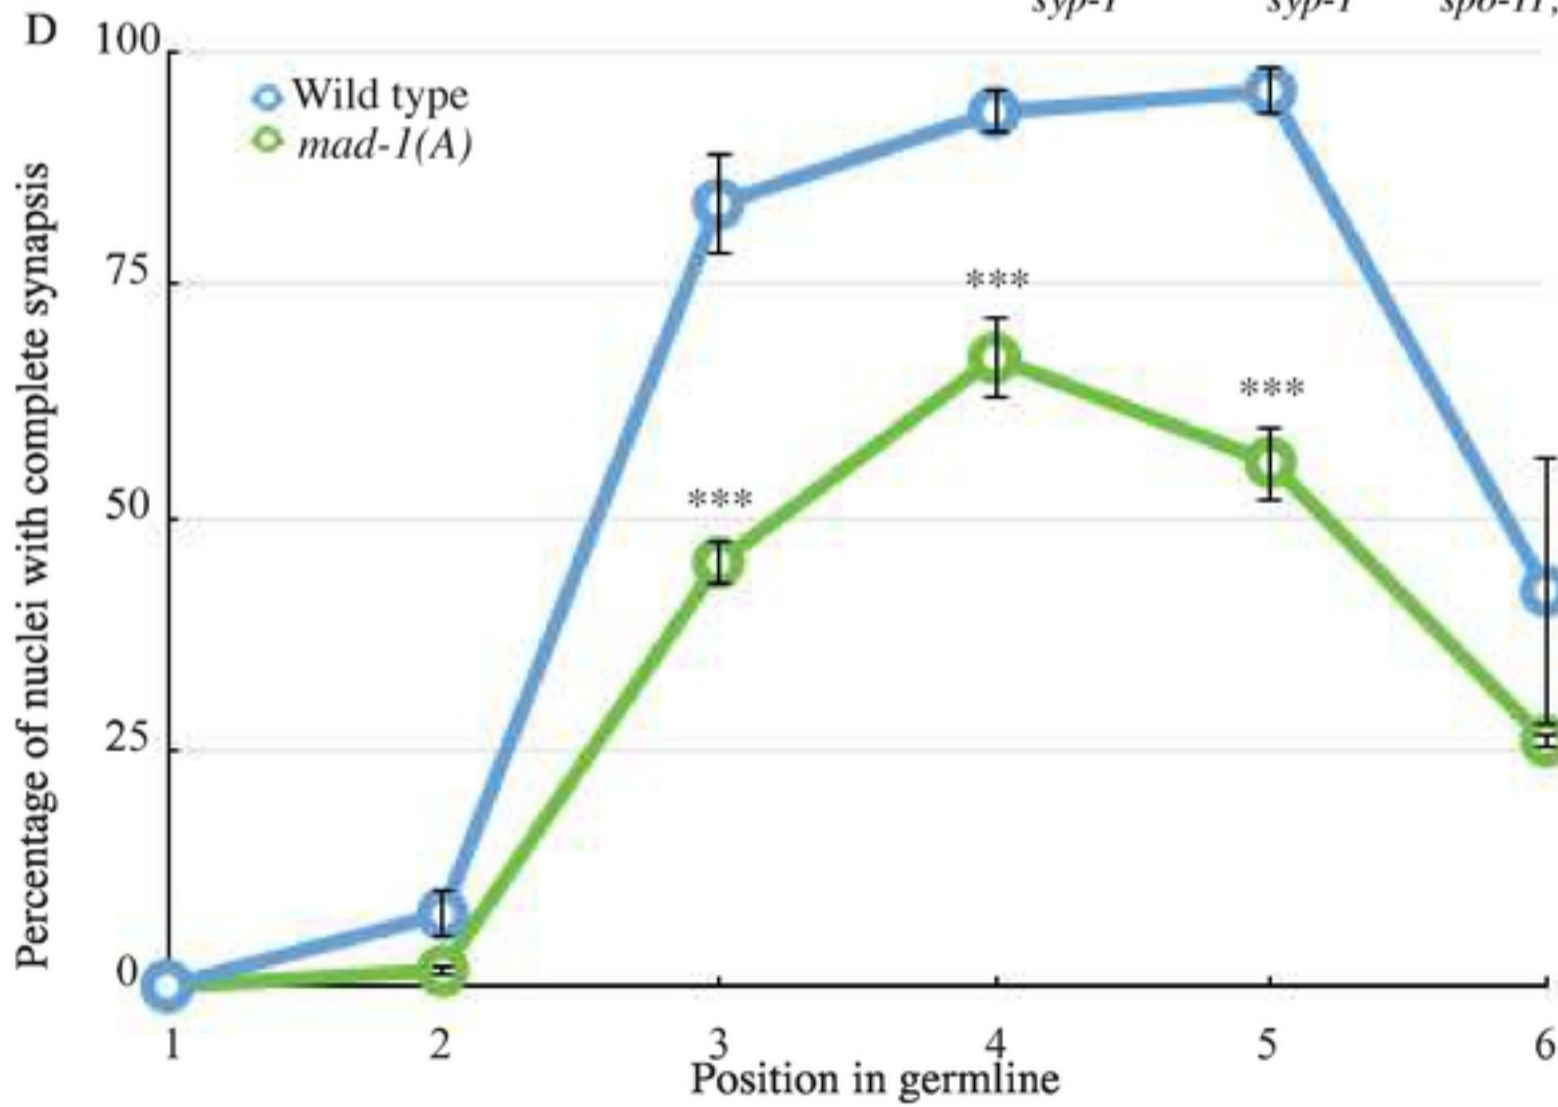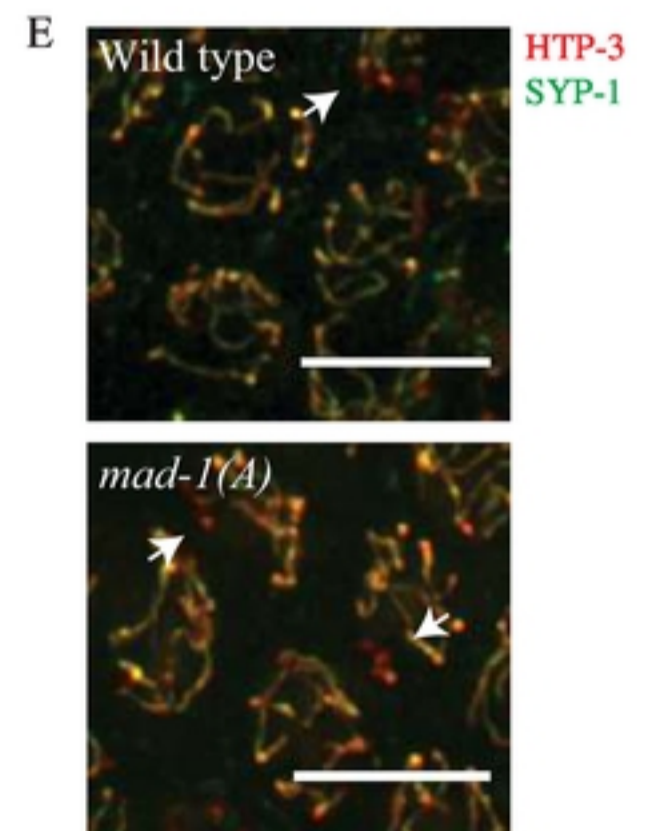

Figure

Figure 6

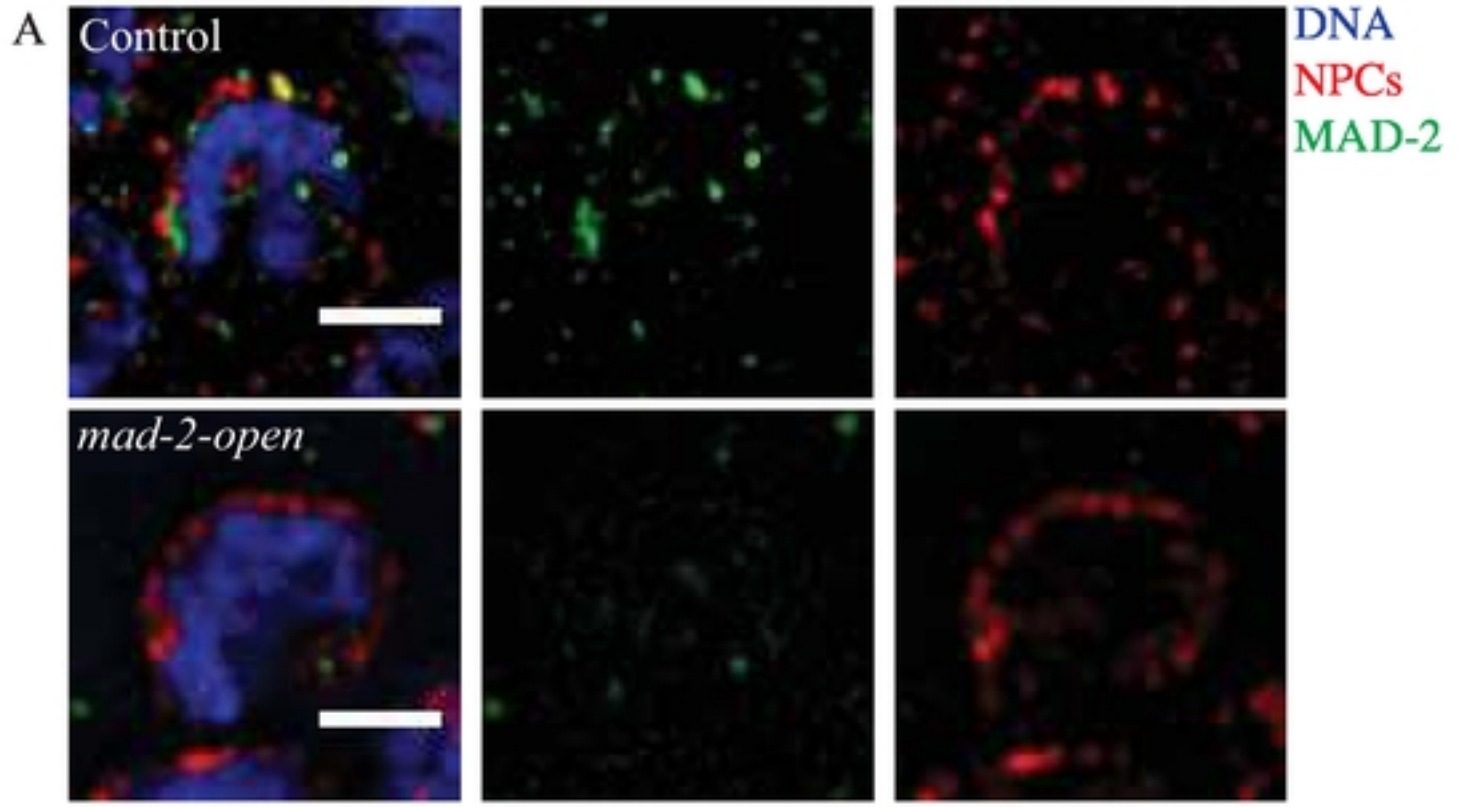

B

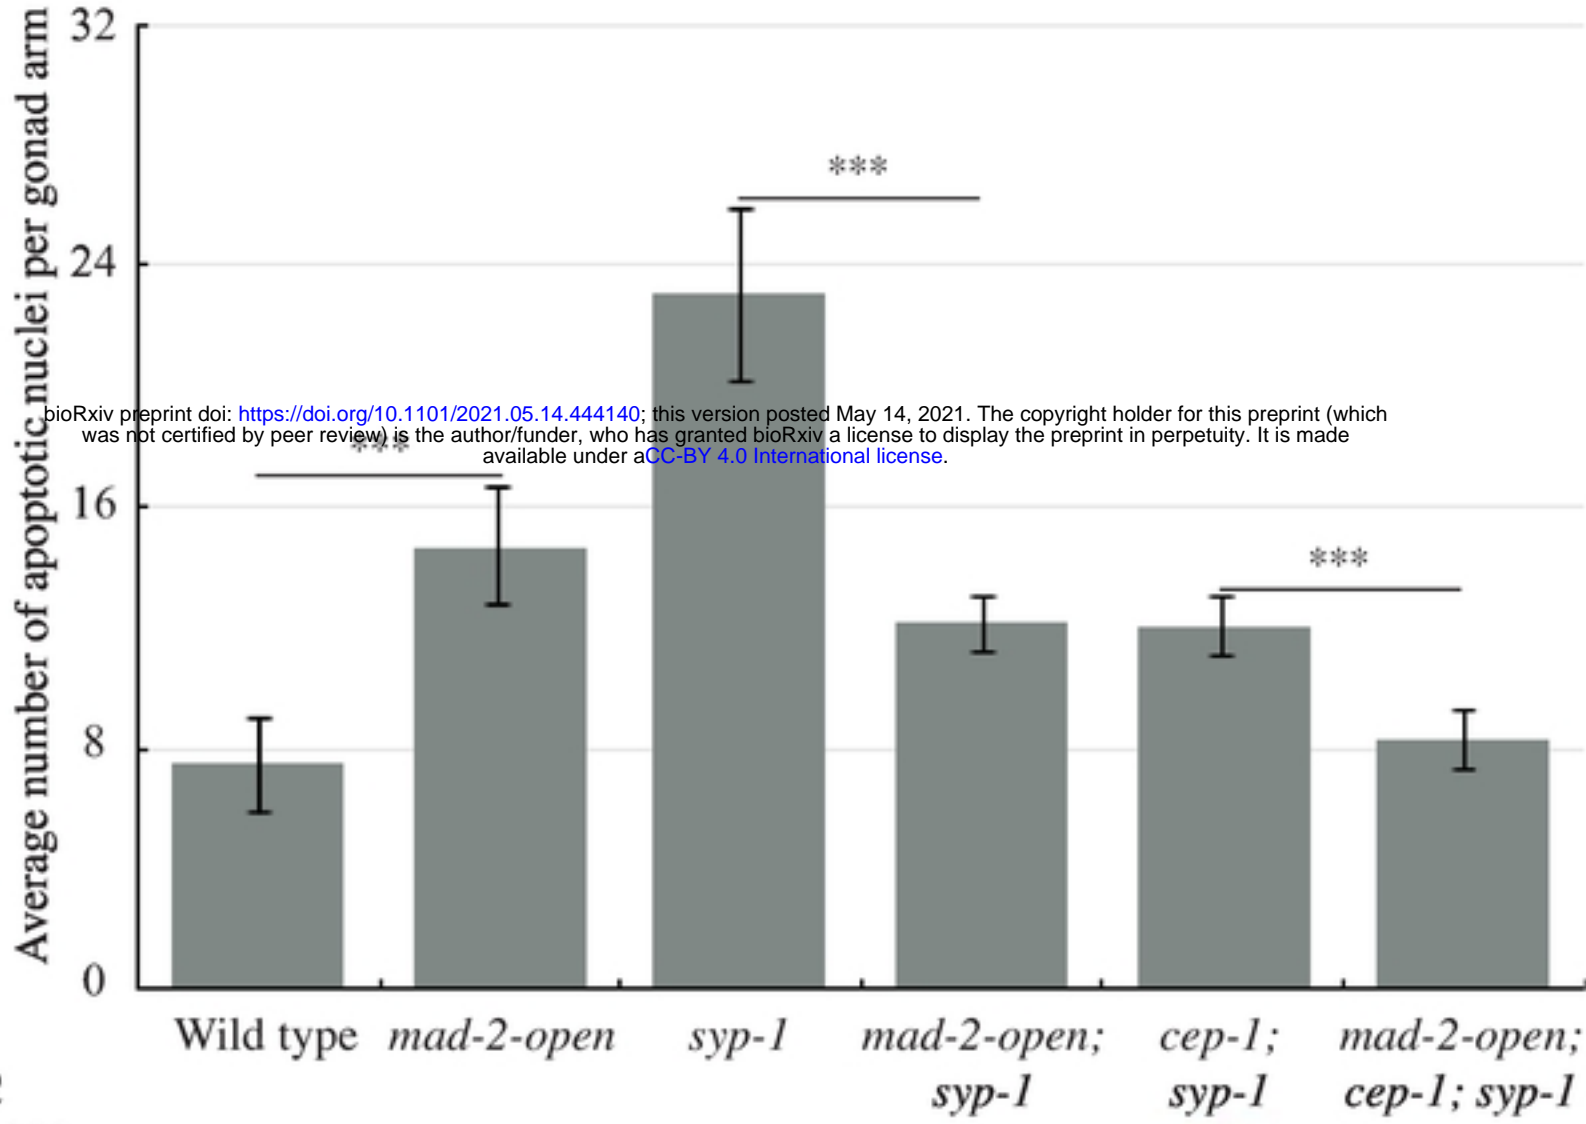

C

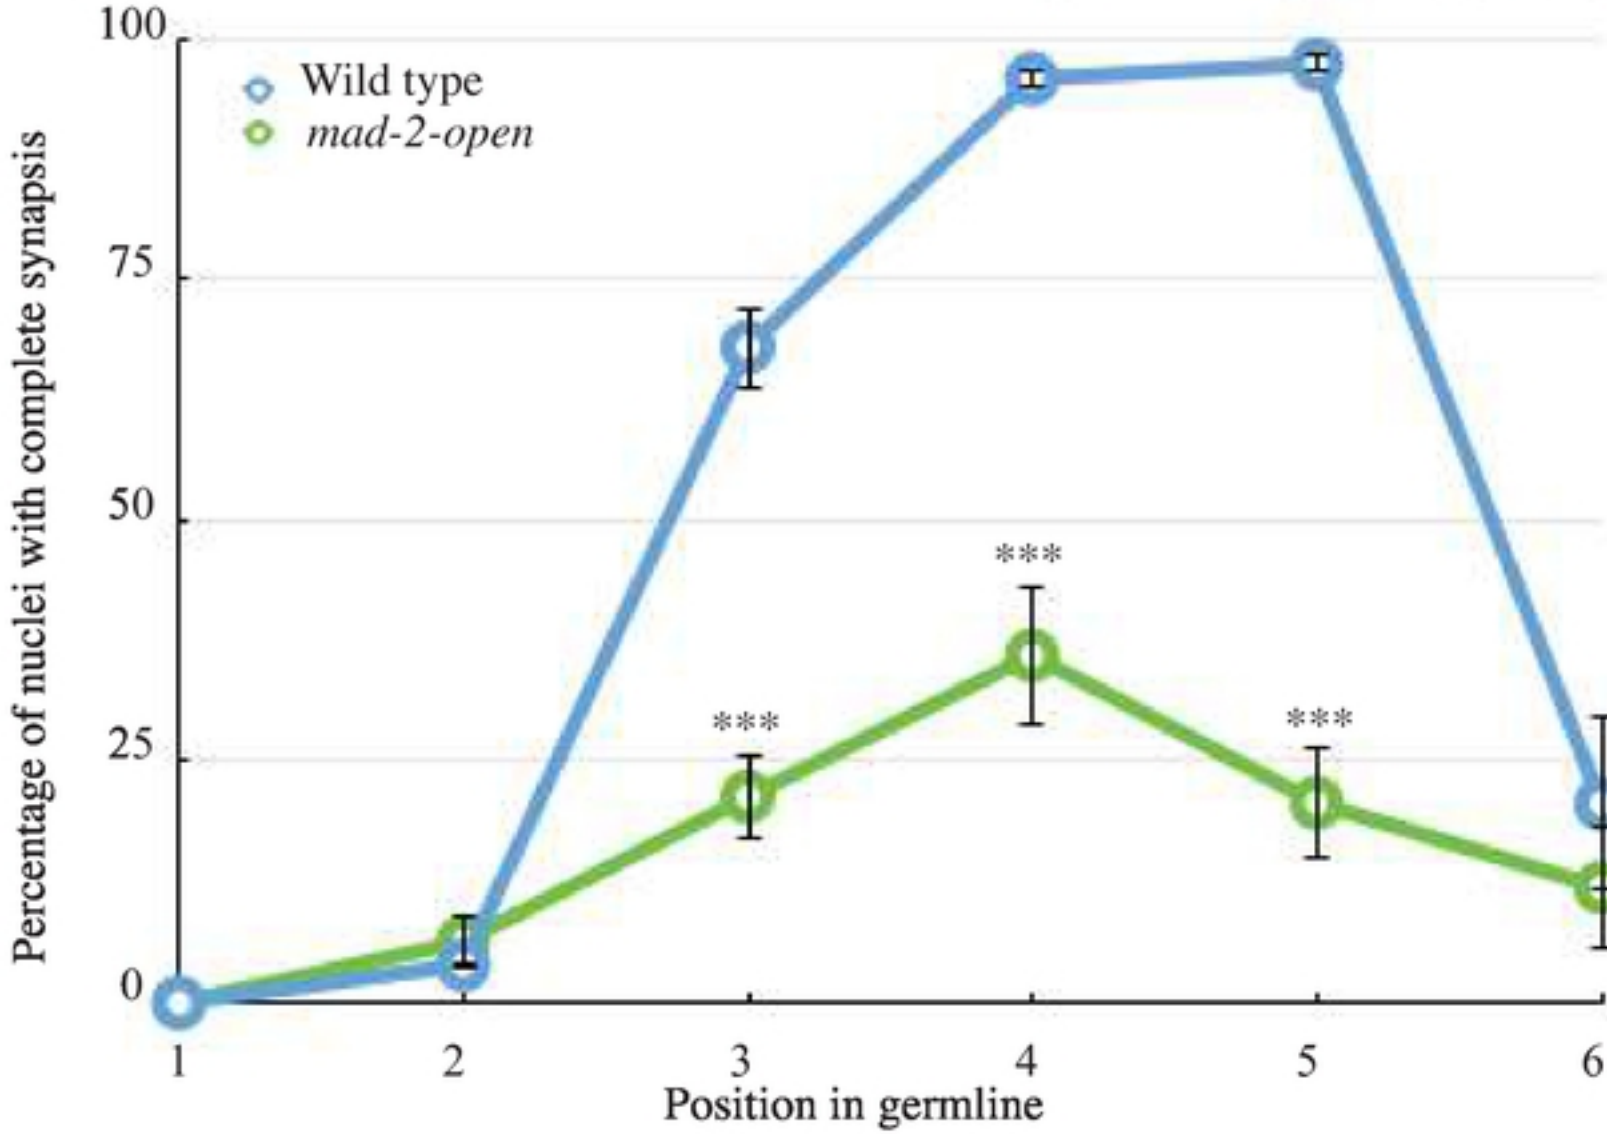

D

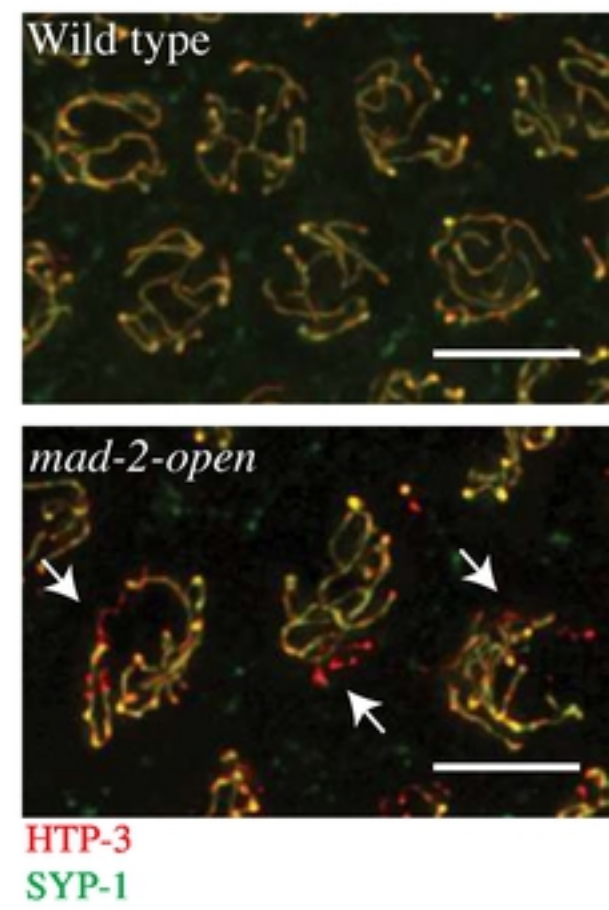

Figure

Figure S1

A

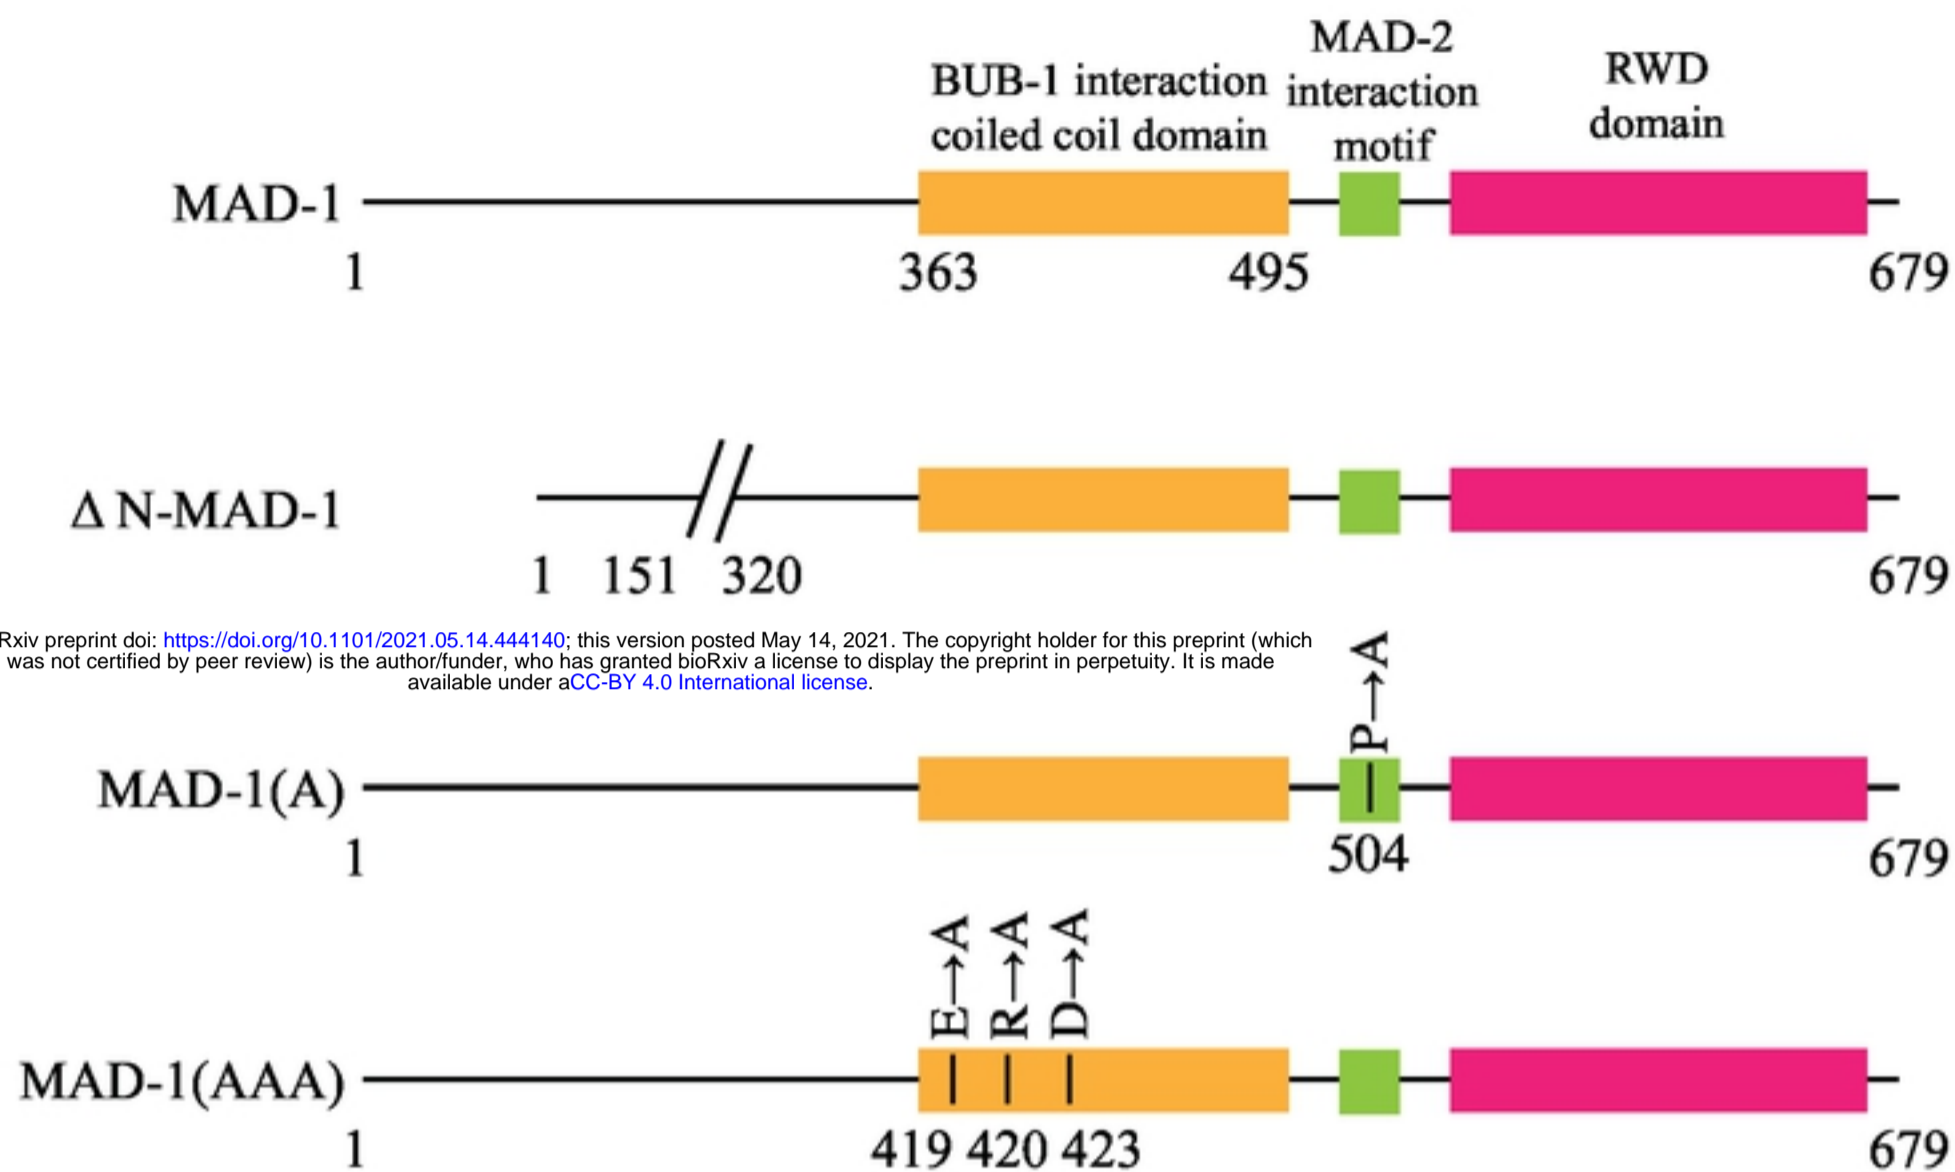

B

|                           | Synapsis checkpoint | Synapsis | MAD-1 localization to nuclear periphery? | MAD-2 localization to nuclear periphery? |
|---------------------------|---------------------|----------|------------------------------------------|------------------------------------------|
| Wild type                 | Normal              | Normal   | Yes                                      | Yes                                      |
| $\Delta N$ - <i>mad-1</i> | Affected            | Normal   | No                                       | Yes                                      |
| <i>mad-1(A)</i>           | Affected            | Delayed  | Yes                                      | No                                       |
| <i>mad-1(AAA)</i>         | Normal              | Normal   | Yes                                      | Yes                                      |

Figure

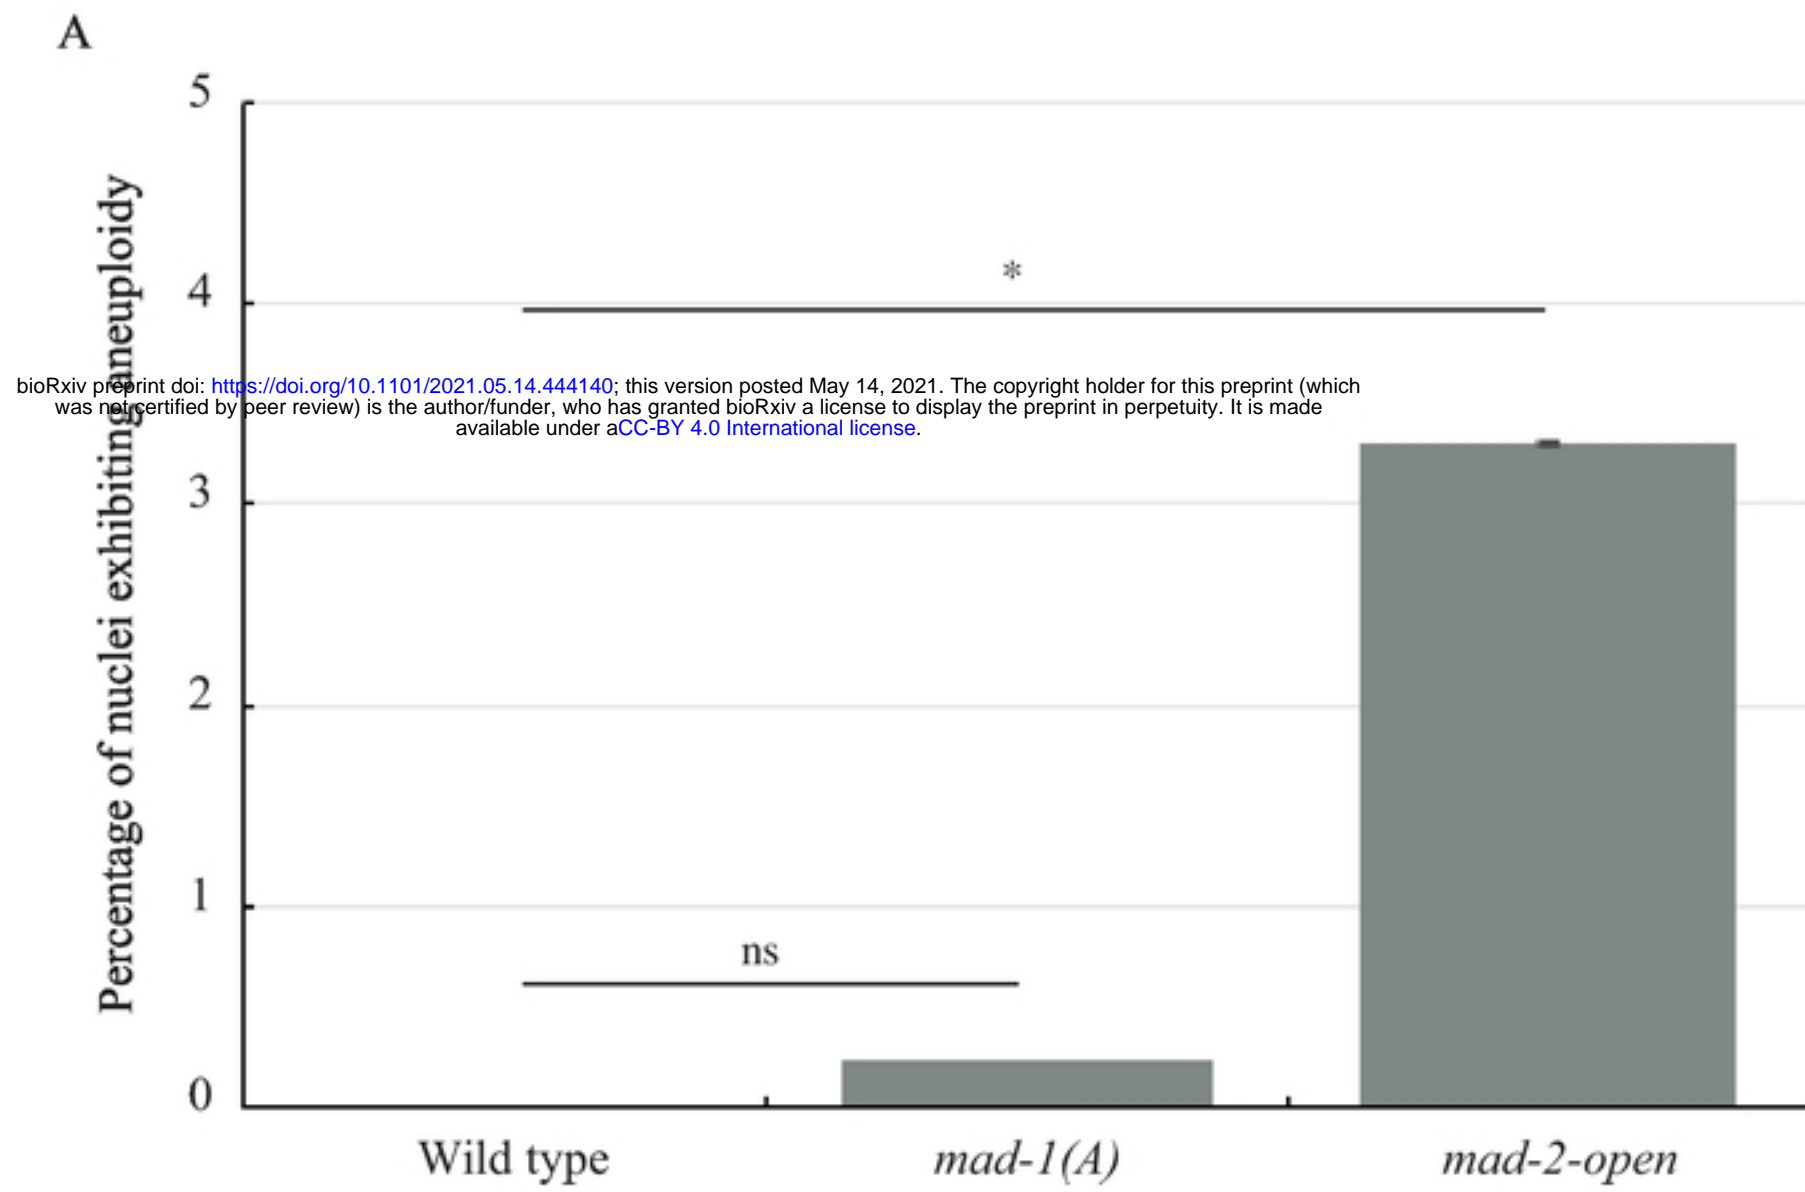

B

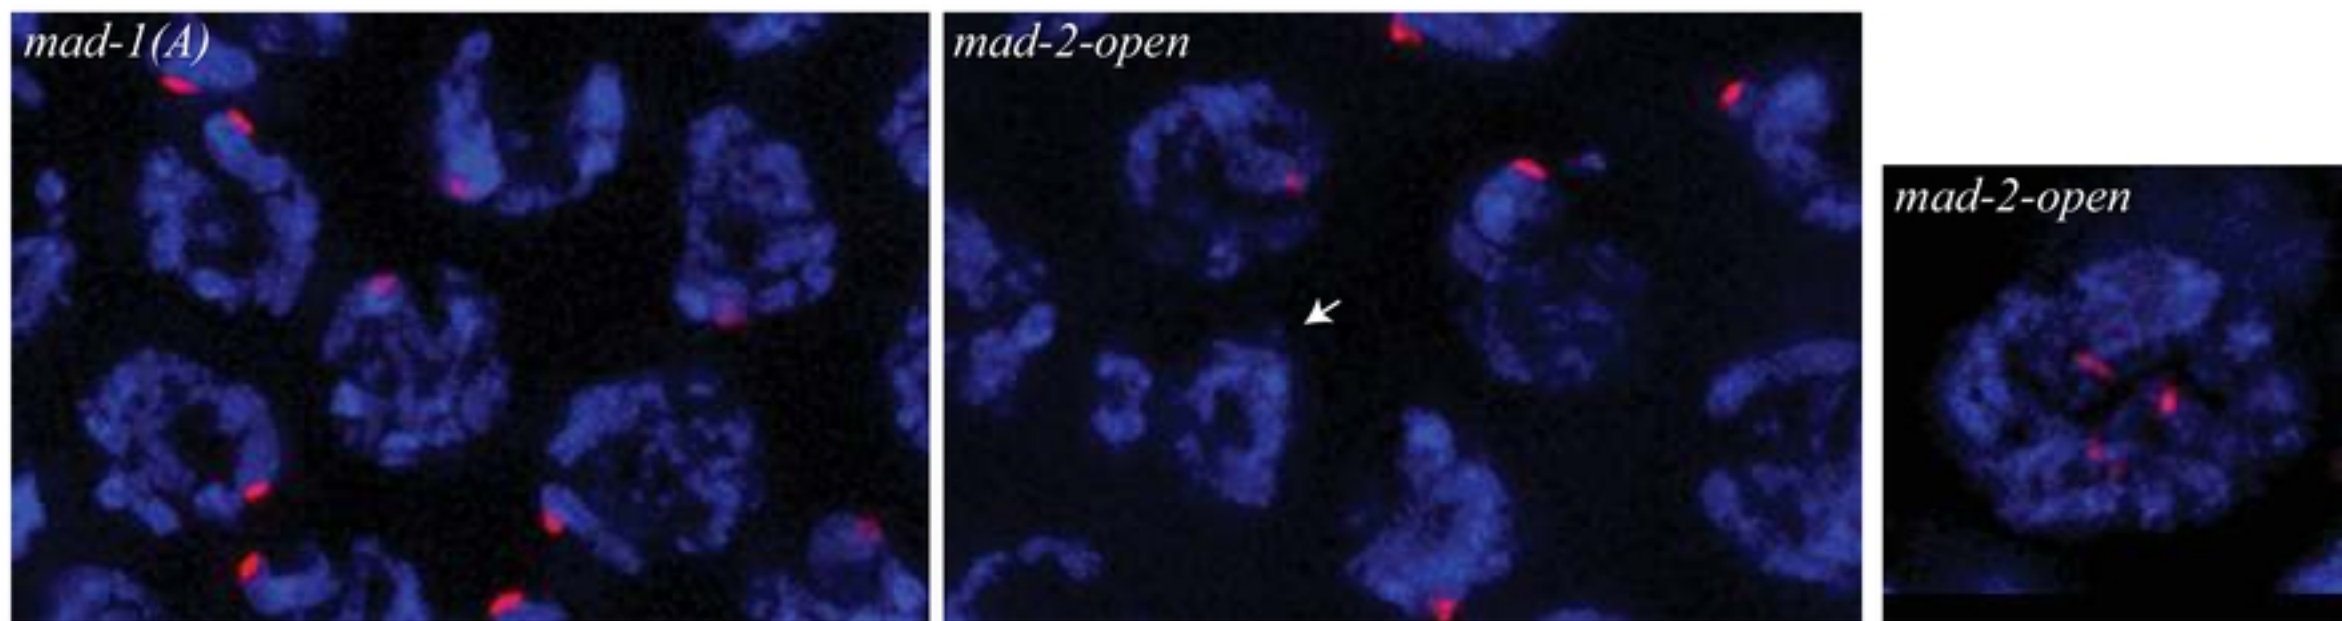

DNA  
HIM-8

Figure S3

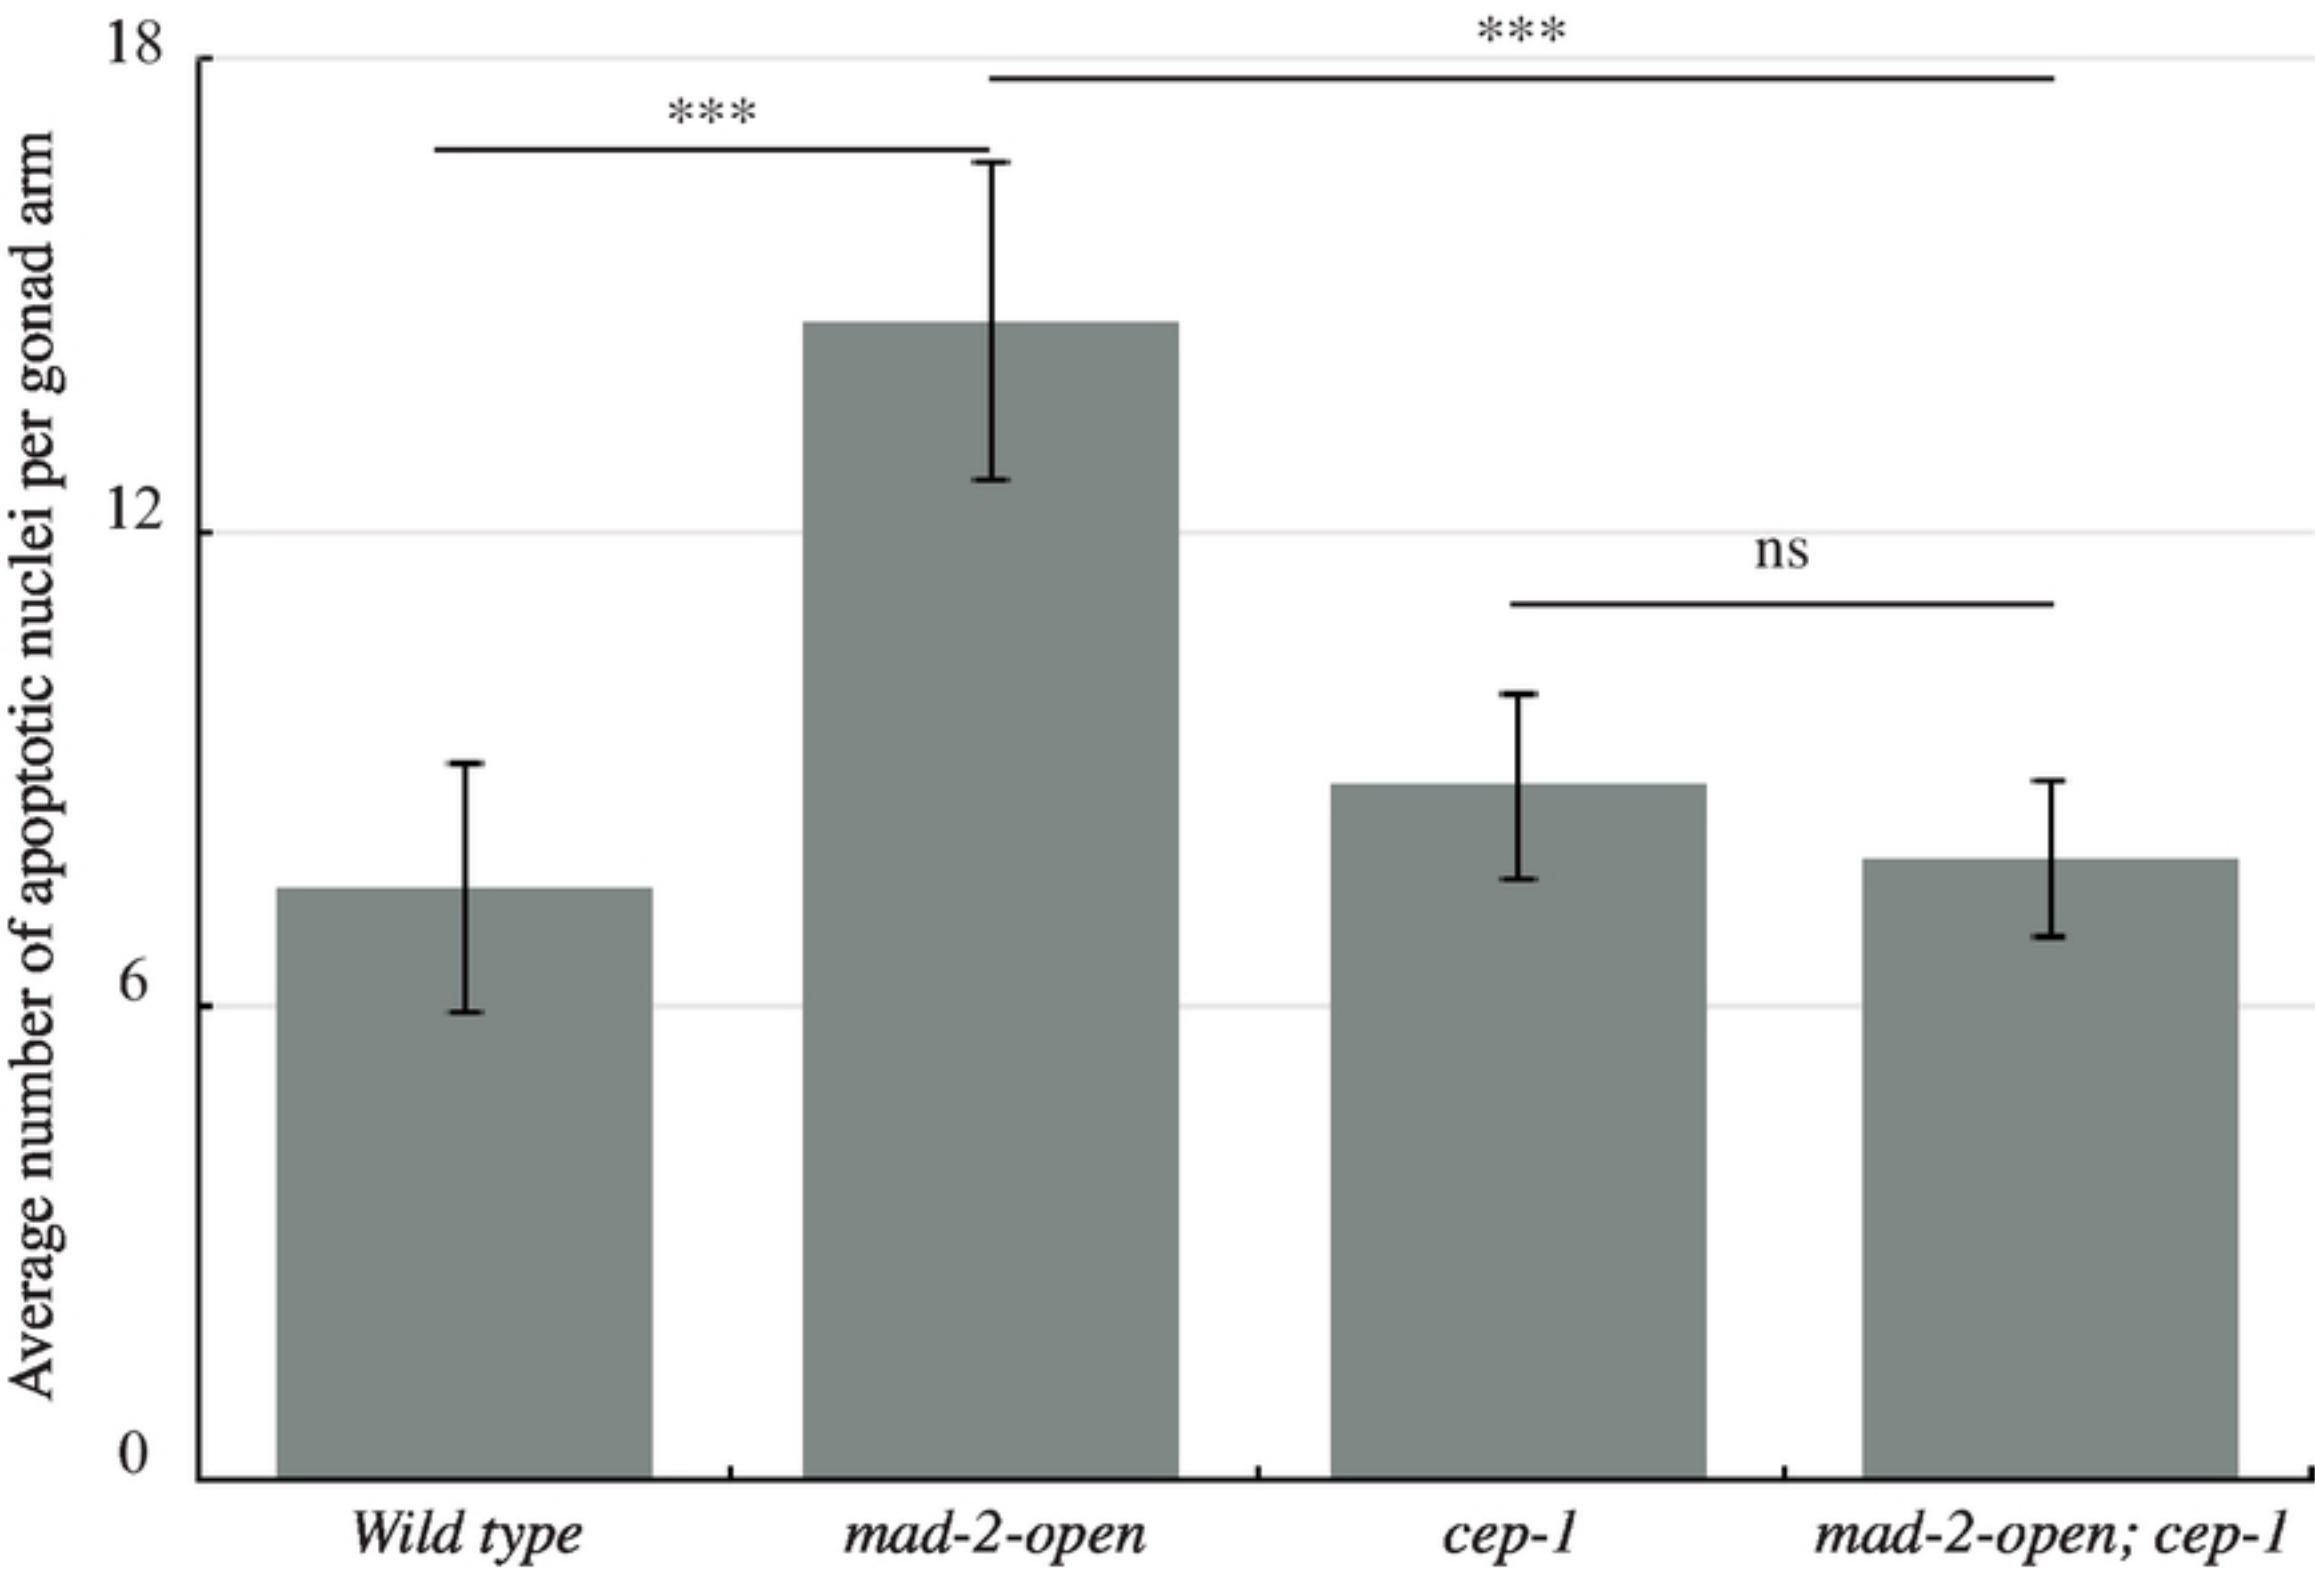

Figure
